# Supplementary material for: Bovine α-lactalbumin-derived peptides attenuate TNF-α-induced insulin resistance and inflammation in 3T3-L1 adipocytes through inhibiting JNK and NF-κB signaling
Source: Royal Society of Chemistry journal article supplement (doi:10.1039/d1fo01217g), 2022-01-01
Supplement: d1fo01217g1.pdf [file d1fo01217g1.pdf]

**Supplementary Table 1. Sequences for primers used in RT-qPCR**

| Gene          | Primer        | Sequence (5'-3')           |
|---------------|---------------|----------------------------|
| TNF- $\alpha$ | Forward prime | CATCTTCTCAAAATTTCGAGTGACAA |
|               | Reverse prime | TGGGAGTAGACAAGGTACAACCC    |
| IL-1 $\beta$  | Forward prime | TCAAATCTCGCAGCAGCACATC     |
|               | Reverse prime | CCAGCAGGTTATCATCATCATCCC   |
| IL-6          | Forward prime | ATGGATGCTACCAAAGTGGAT      |
|               | Reverse prime | TGAAGGACTCTCTGGCTTTGTCT    |
| MCP-1         | Forward prime | GCCCCACTCACCTGCTGCTACT     |
|               | Reverse prime | CCTGCTGCTGGTGATCCTCTTGT    |
| GAPDH         | Forward prime | TGGCAAAGTGGAGATTGTTGC      |
|               | Reverse prime | AAGATGGTGATGGGCTTCCCG      |

TNF- $\alpha$ , tumor necrosis factor alpha; IL-1 $\beta$ , interleukin 1 beta; IL-6, interleukin 6; MCP-1, monocyte chemoattractant protein 1; GAPDH, glyceraldehyde 3-phosphate dehydrogenase.

**Supplementary Table 2. Peptide content and degree of hydrolysis of bovine  $\alpha$ -lactalbumin hydrolysates**

| Sample            | Peptide content (mg/g)          | Degree of hydrolysis (%)       |
|-------------------|---------------------------------|--------------------------------|
| $\alpha$ -LAH     | 746.67 $\pm$ 11.47 <sup>c</sup> | 31.46 $\pm$ 0.27 <sup>c</sup>  |
| GD- $\alpha$ -LAH | 789.87 $\pm$ 17.25 <sup>b</sup> | 39.00 $\pm$ 0.28 <sup>b</sup>  |
| CA- $\alpha$ -LAH | 821.86 $\pm$ 4.68 <sup>a</sup>  | 43.716 $\pm$ 0.97 <sup>a</sup> |

$\alpha$ -LAH,  $\alpha$ -lactalbumin hydrolysates; GD- $\alpha$ -LAH, gastrointestinal digest of  $\alpha$ -LAH; CA- $\alpha$ -LAH, Caco-2 cell transported permeates of GD- $\alpha$ -LAH.

Each value represents the mean  $\pm$  SD (n=3). Values within a row without same superscript are significantly different at  $p < 0.05$ .

**Figure captions:**

**Supplementary Figure 1.** Identification of peptides from CA- $\alpha$ -LAH. (A) LC-MS/MS spectrum of VSLPEWV; (B) LC-MS/MS spectrum of SLPEWV; (C) LC-MS/MS spectrum of FLDDL; (D) LC-MS/MS spectrum of KILDK; (E) LC-MS/MS spectrum of LDKVGIN.

**Supplementary Figure 2.** Mature AA sequences of bovine  $\alpha$ -lactalbumin. Peptide sequences identified in the F2 are underlined.

**Supplementary Figure 3.** The images of the blot for Figure 1B.

**Supplementary Figure 4.** The images of the blot for Figure 1C.

**Supplementary Figure 5.** The images of the blot for Figure 2B.

**Supplementary Figure 6.** The images of the blot for Figure 2C.

**Supplementary Figure 7.** The images of the blot for Figure 3B.

**Supplementary Figure 8.** The images of the blot for Figure 3C.

**Supplementary Figure 9.** The images of the blot for Figure 5B.

**Supplementary Figure 10.** The images of the blot for Figure 5C.

**Supplementary Figure 11.** The images of the blot for Figure 6A.

**Supplementary Figure 12.** The images of the blot for Figure 6B.

**Supplementary Figure 13.** The images of the blot for Figure 6C.

**Supplementary Figure 14.** The images of the blot for Figure 7B.

Supplementary Figure 1.

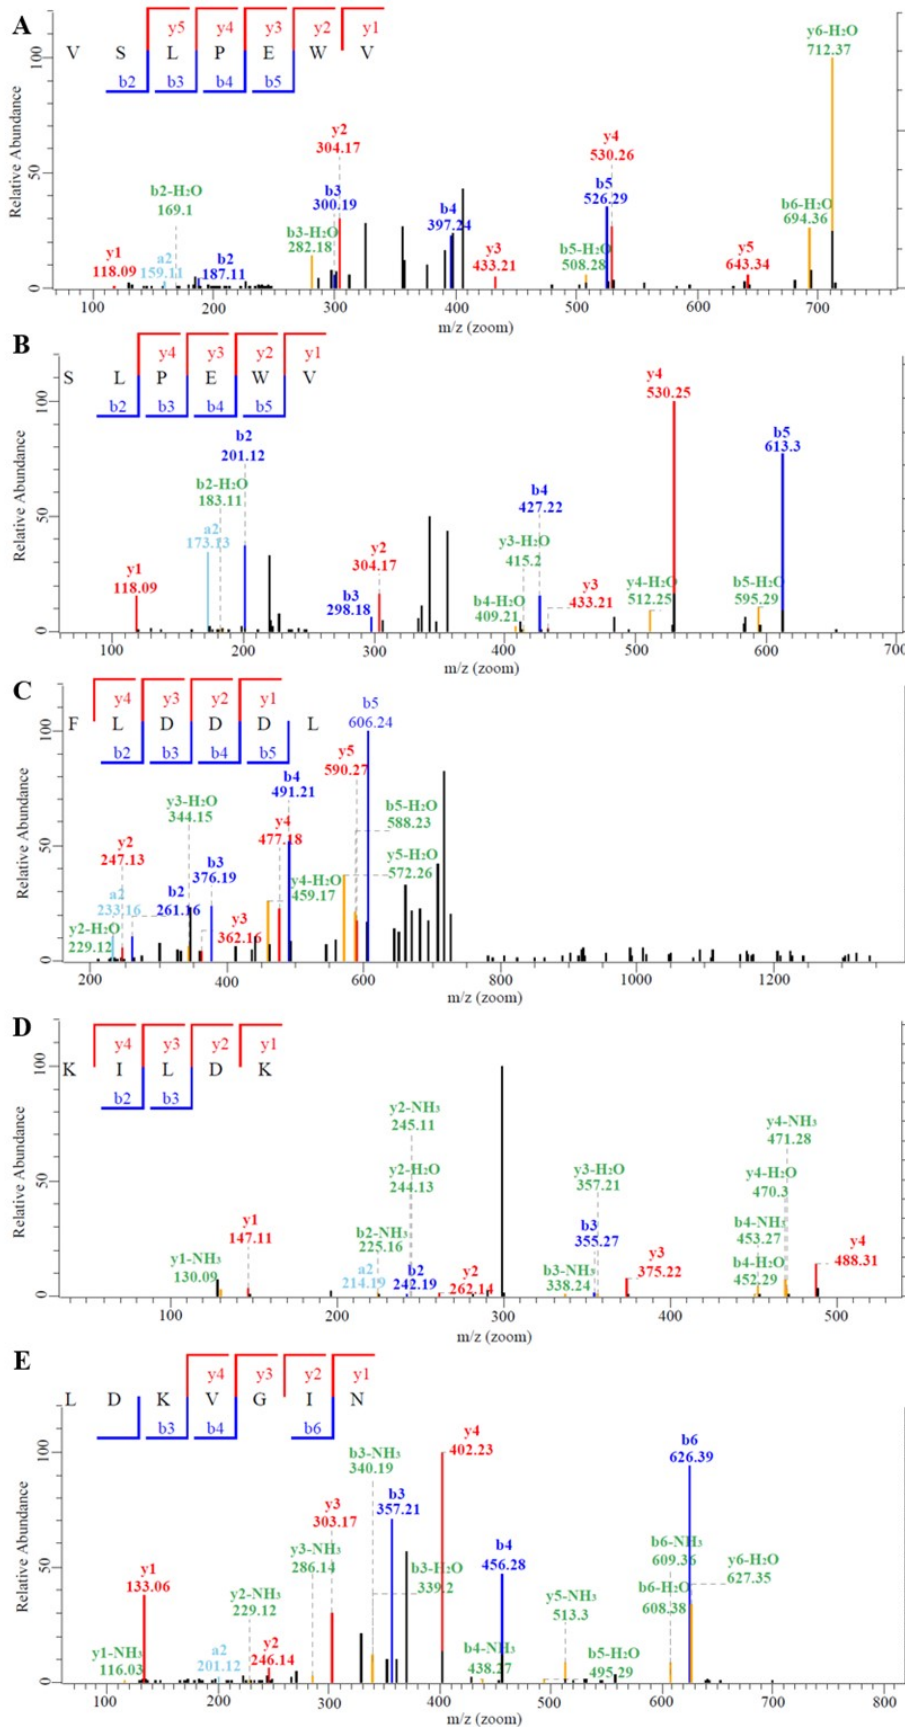

**Supplementary Figure 2.**

                          10                          20                          30  
EQLTKCEVFR<sup>10</sup>ELKDLKGYG<sup>20</sup>GVSLPEWVCT<sup>30</sup>T<sup>31</sup>FHTSGYDT

          40                          50                          60                          70  
Q<sup>41</sup>AIVQNNDSTE<sup>50</sup>YGLFQINNKI<sup>60</sup>W<sup>61</sup>CKDDQNPHS<sup>70</sup>S<sup>71</sup>NICNISC

          80                          90                          100                          110  
DK<sup>81</sup>FLDDDLTDDIM<sup>90</sup>CVK<sup>91</sup>KILDKV<sup>100</sup>G<sup>101</sup>INYLAKAL<sup>110</sup>CSEKL

                          120  
DQWL<sup>121</sup>CEKL

**Supplementary Figure 3.**

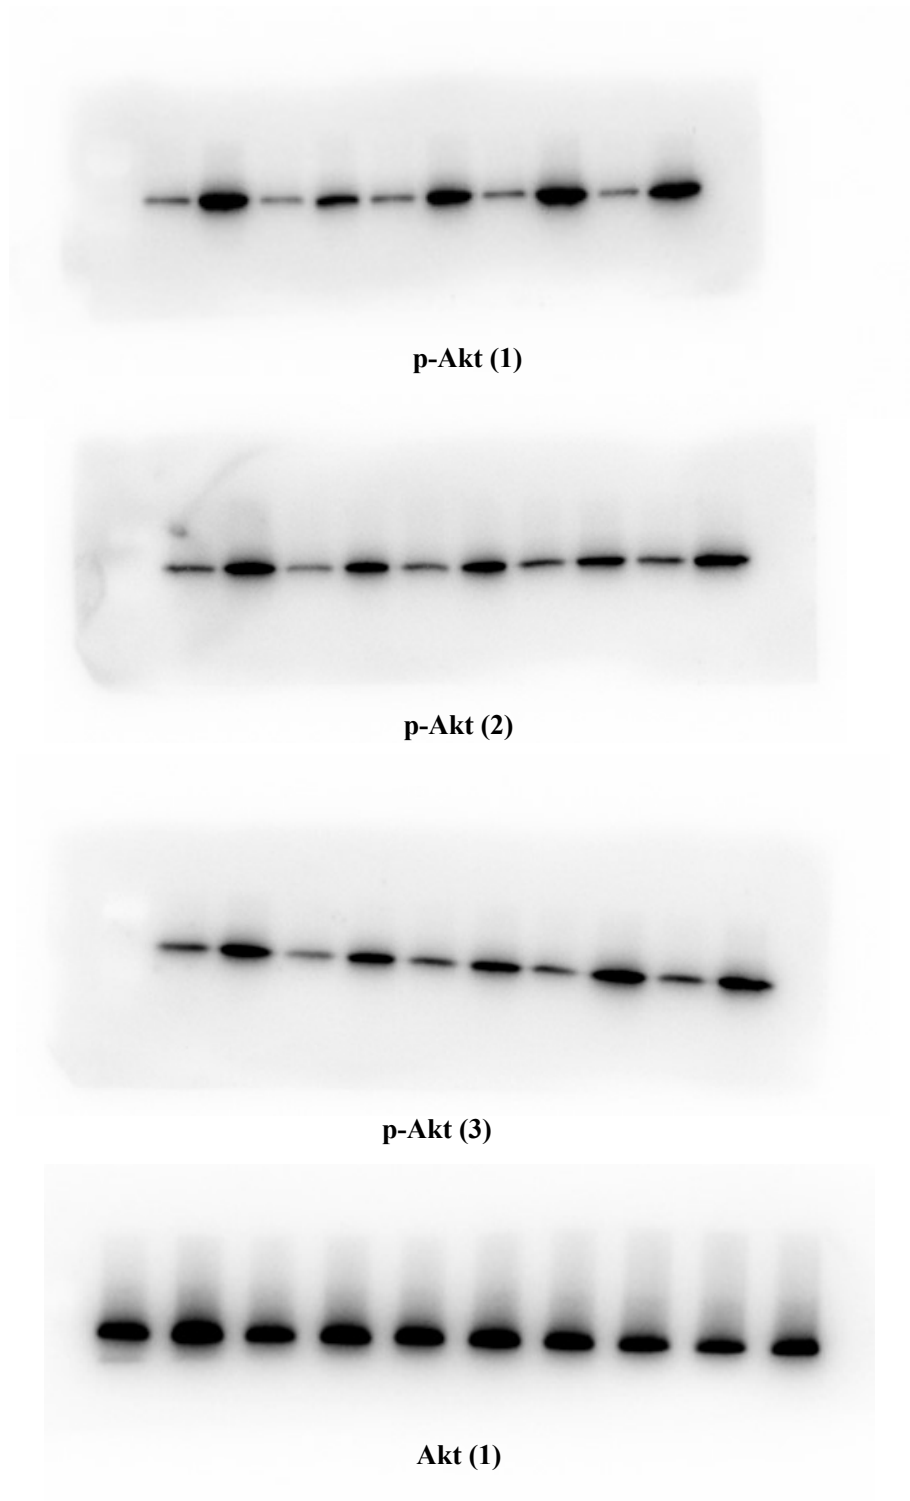

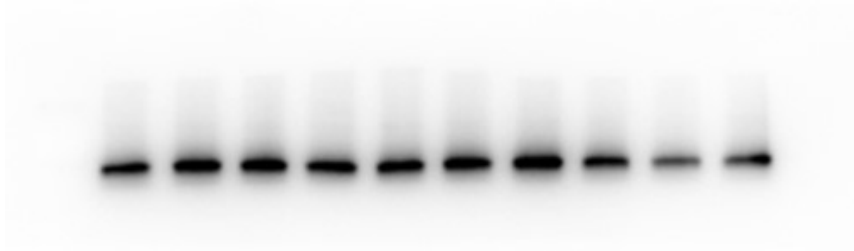

**Akt (2)**

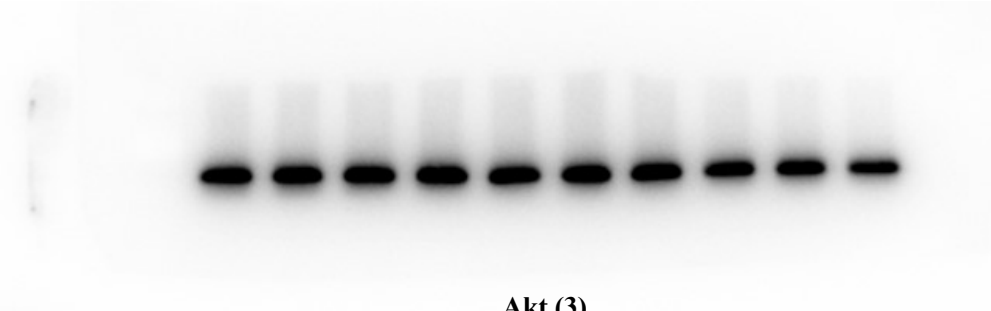

**Akt (3)**

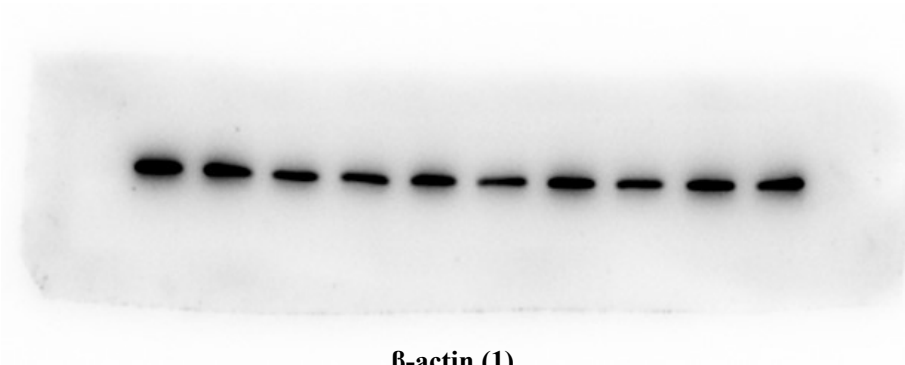

**$\beta$ -actin (1)**

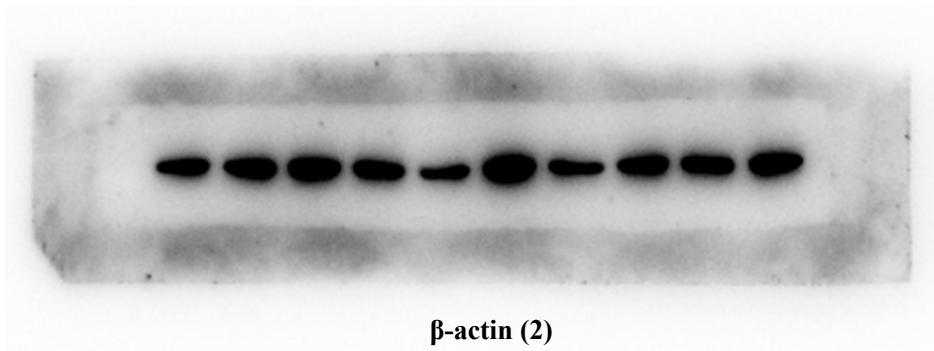

**$\beta$ -actin (2)**

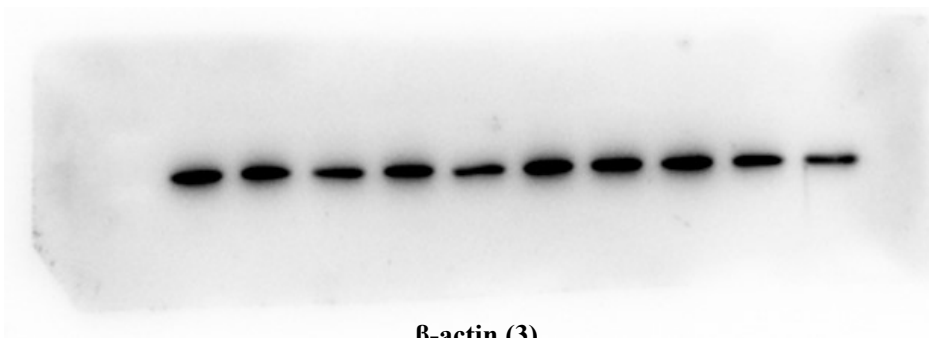

**$\beta$ -actin (3)**

**Supplementary Figure 4.**

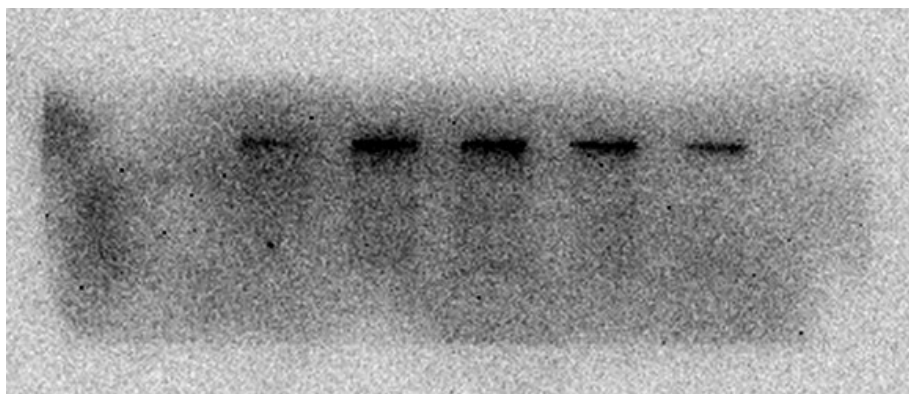

**p-IRS-1 (1)**

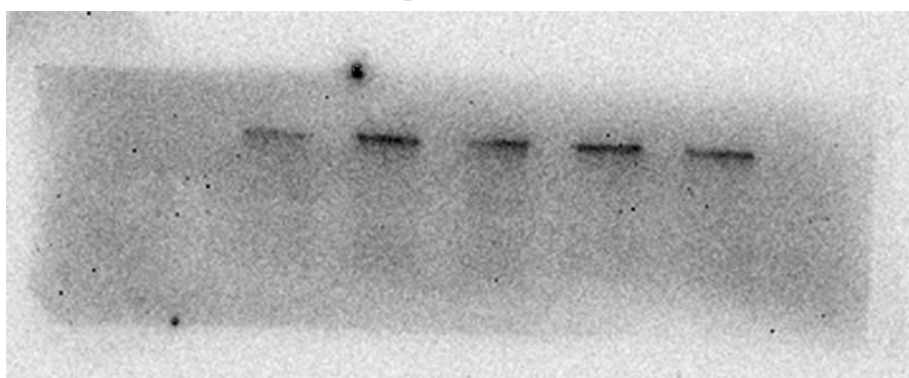

**p-IRS-1 (2)**

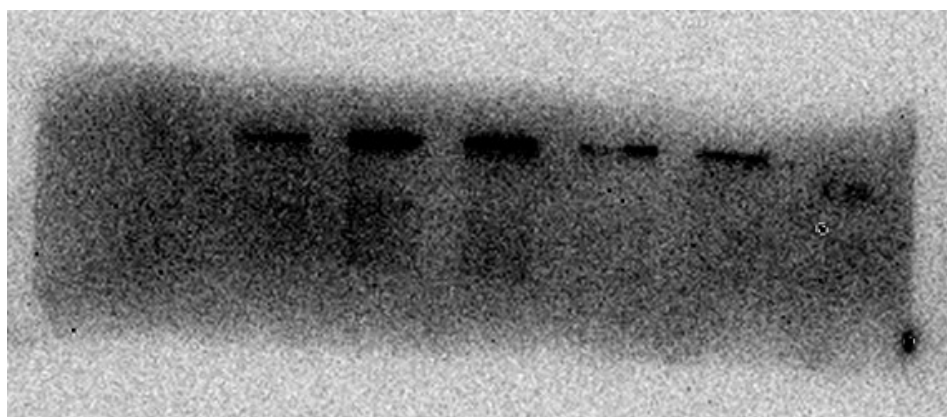

**p-IRS-1 (3)**

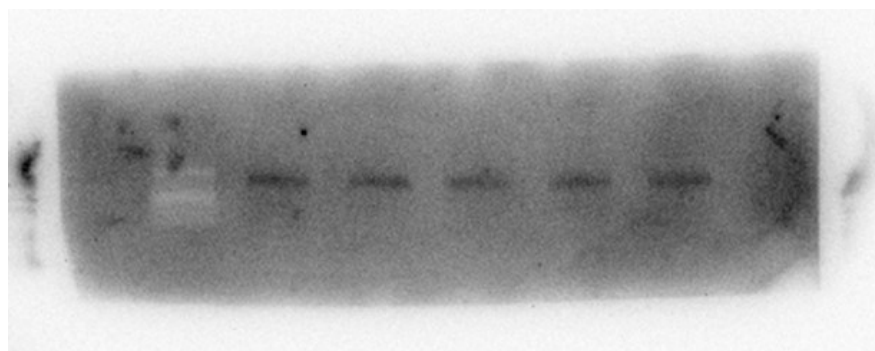

**IRS-1 (1)**



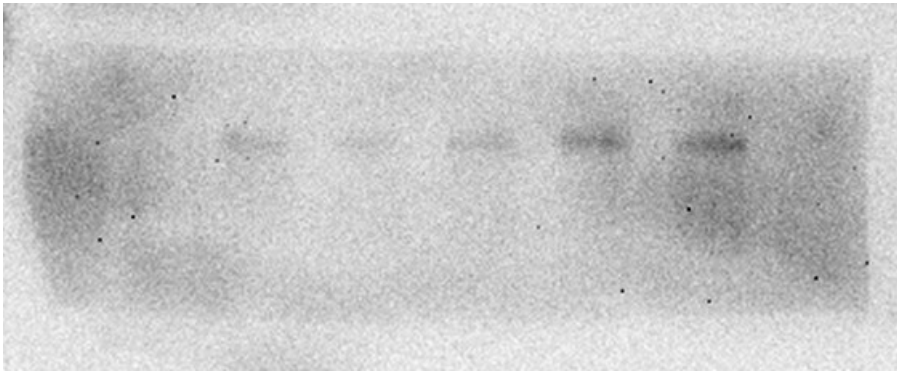

IRS-1 (2)

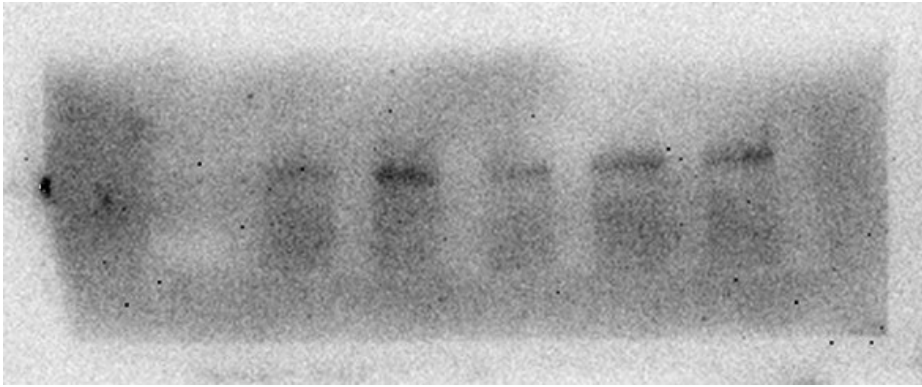

IRS-1 (3)

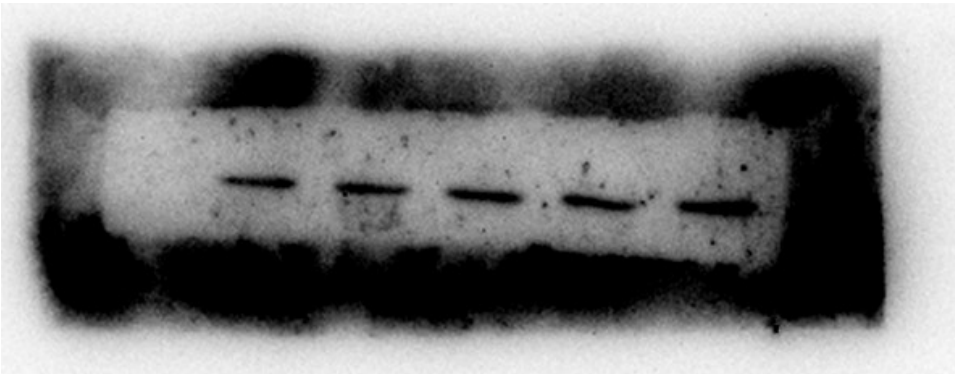

$\beta$ -actin (1)

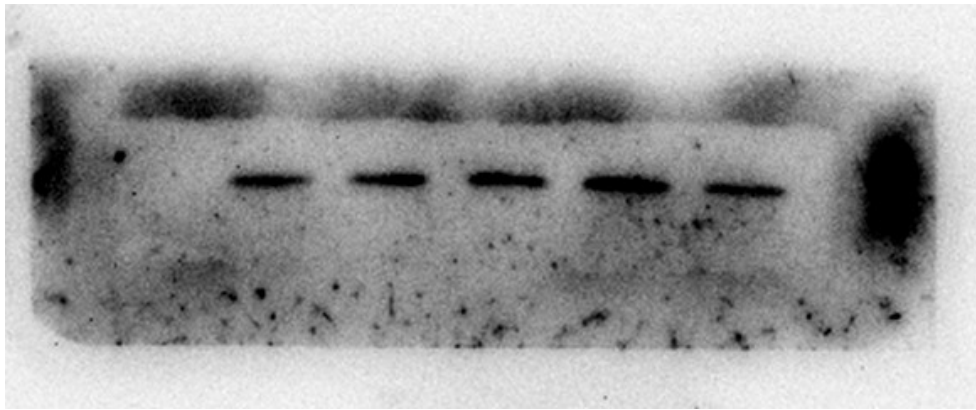

**$\beta$ -actin (2)**

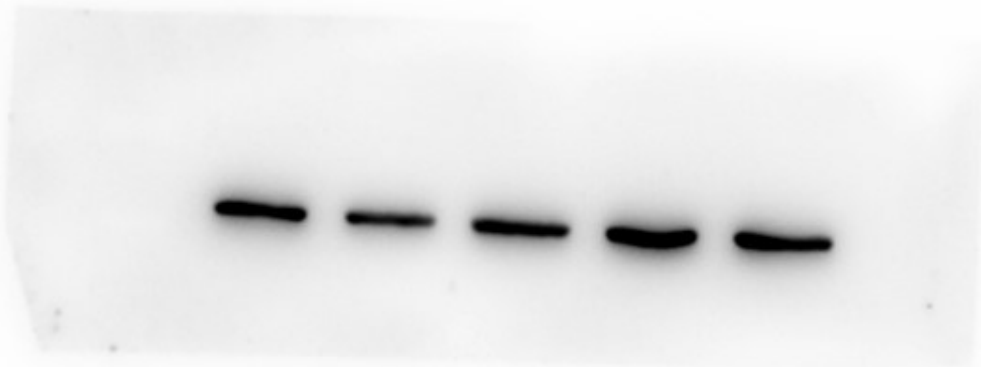

**$\beta$ -actin (3)**

**Supplementary Figure 5.**

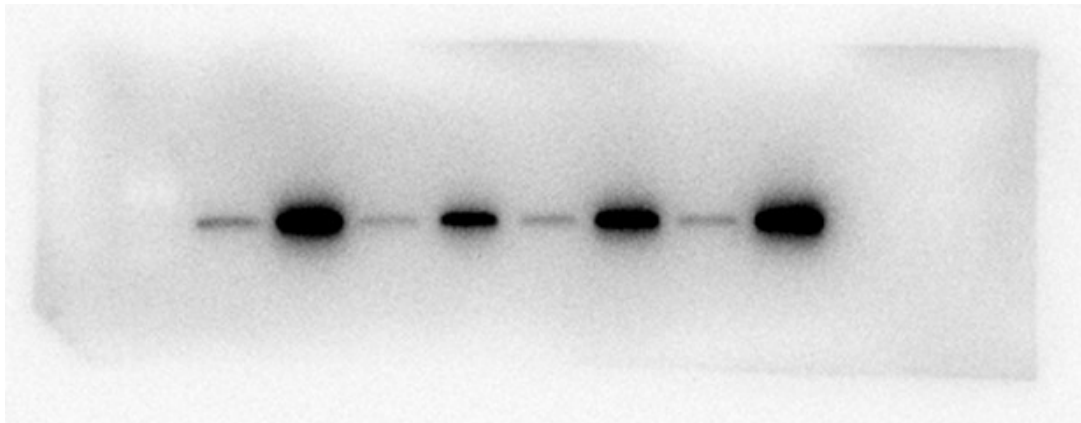

**p-Akt (1)**

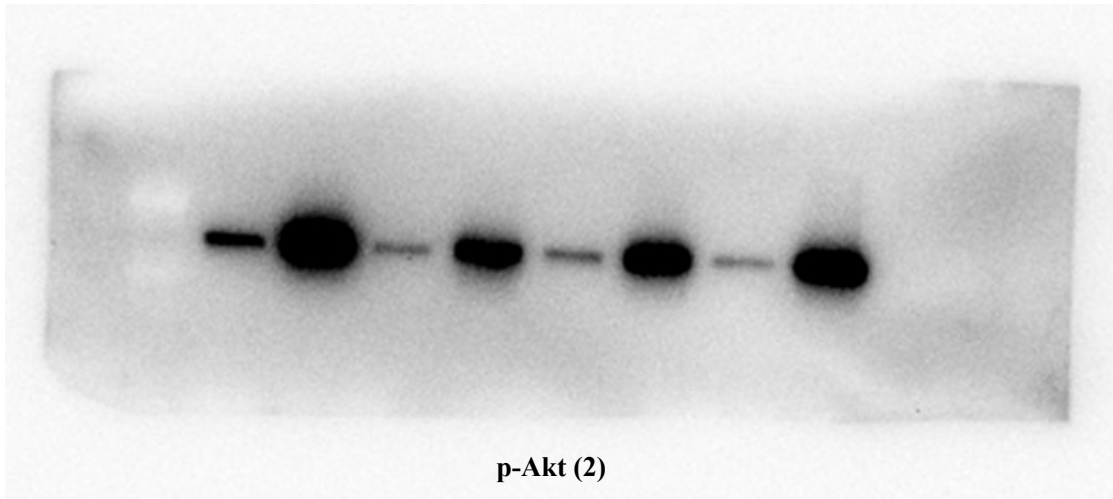

**p-Akt (2)**

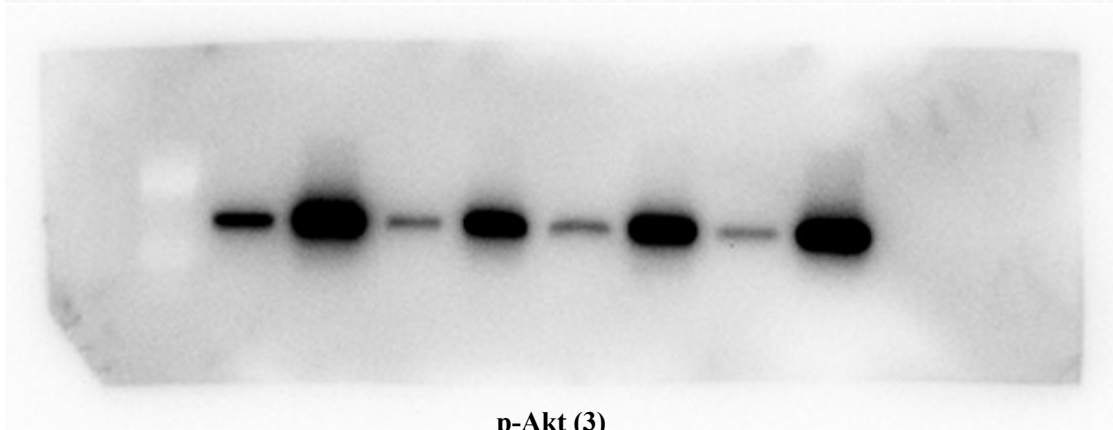

**p-Akt (3)**

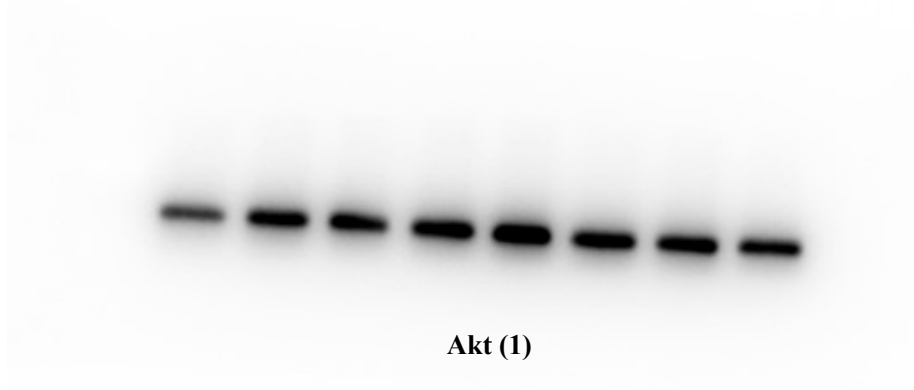

**Akt (1)**

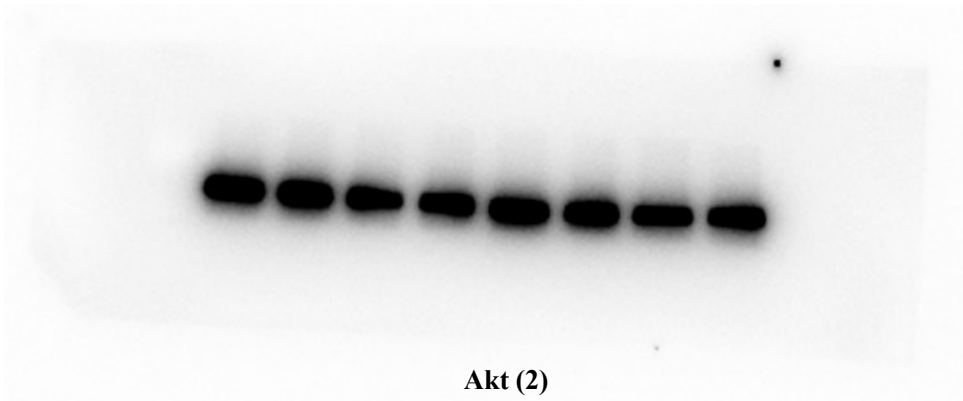

**Akt (2)**

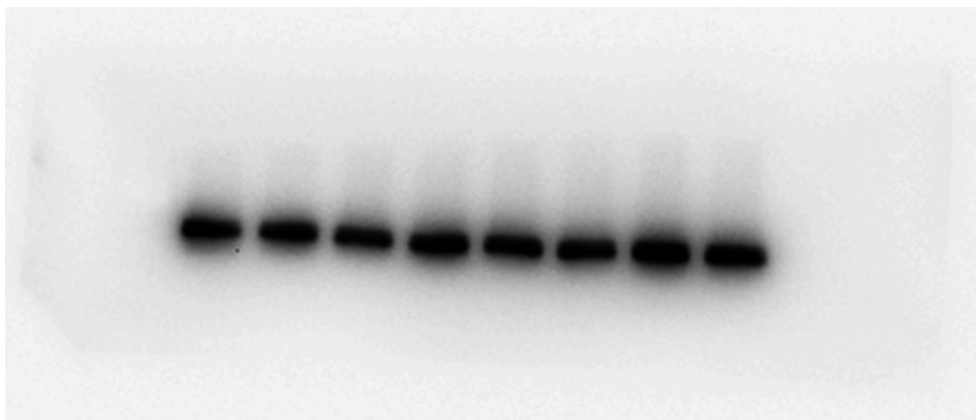

**Akt (3)**

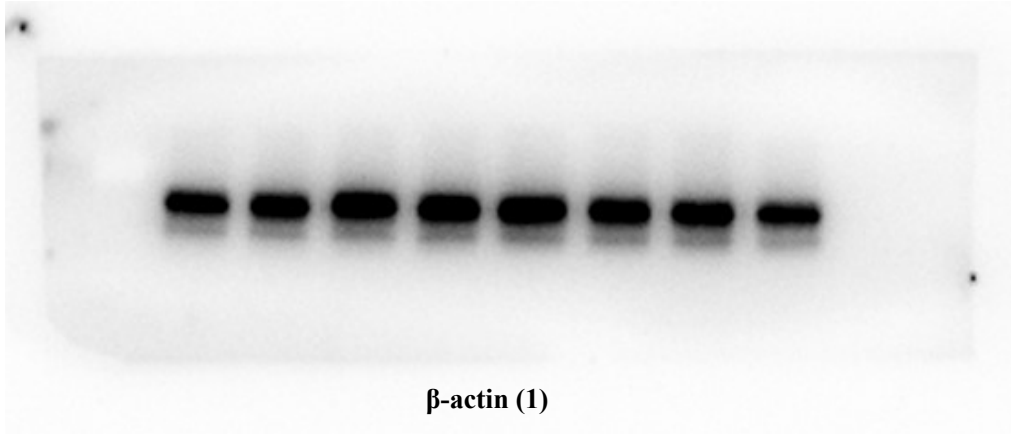

$\beta$ -actin (1)

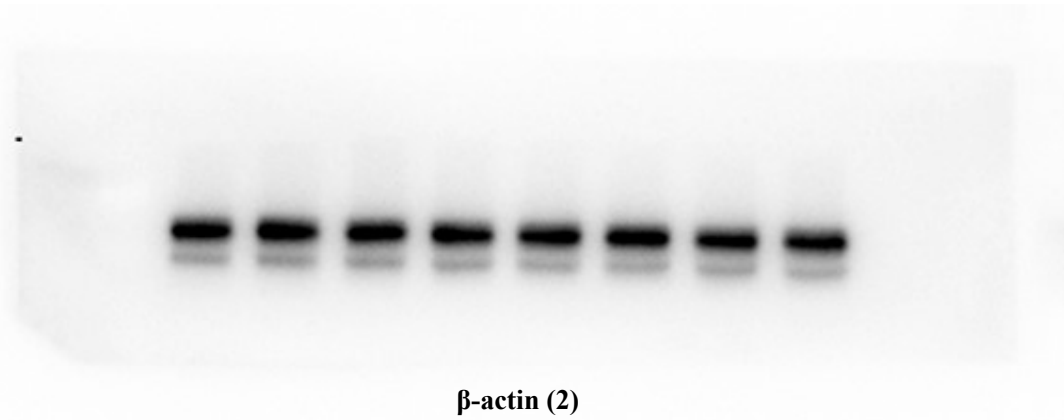

$\beta$ -actin (2)

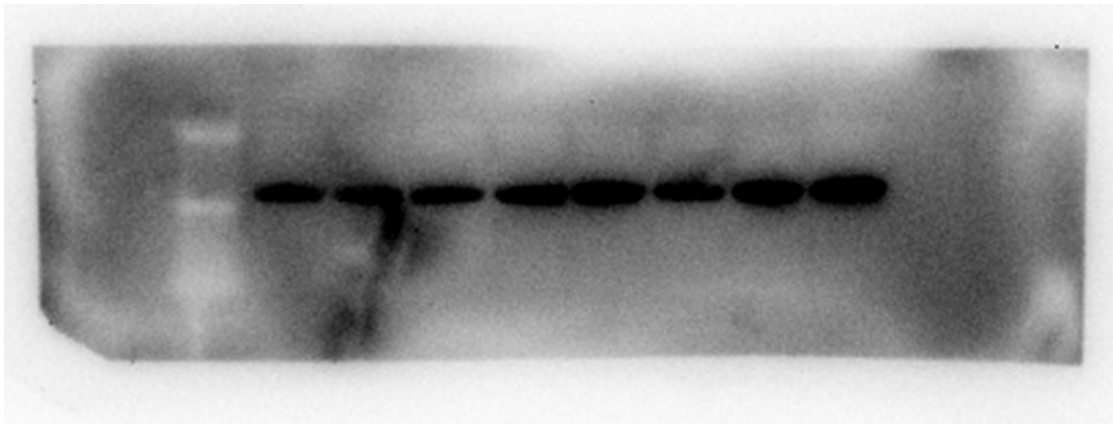

$\beta$ -actin (3)

**Supplementary Figure 6.**

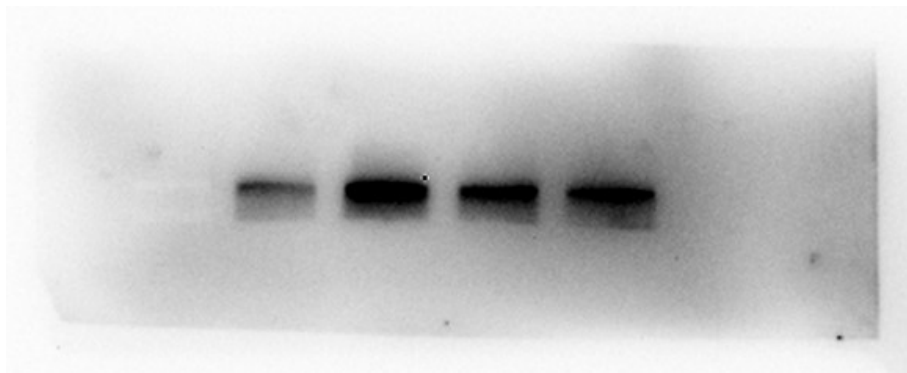

**p-IRS-1 (1)**

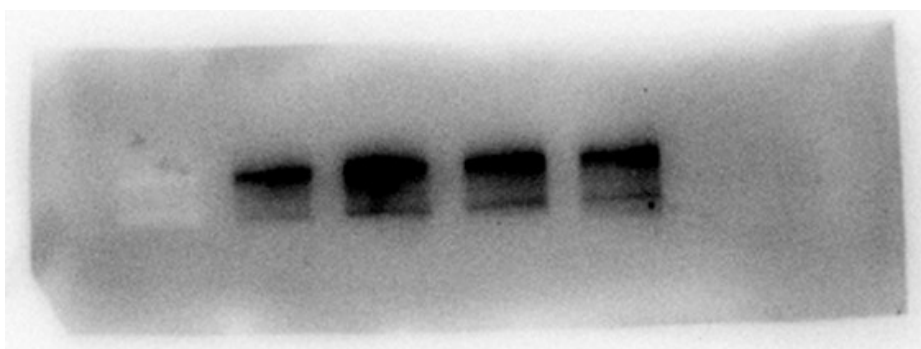

**p-IRS-1 (2)**

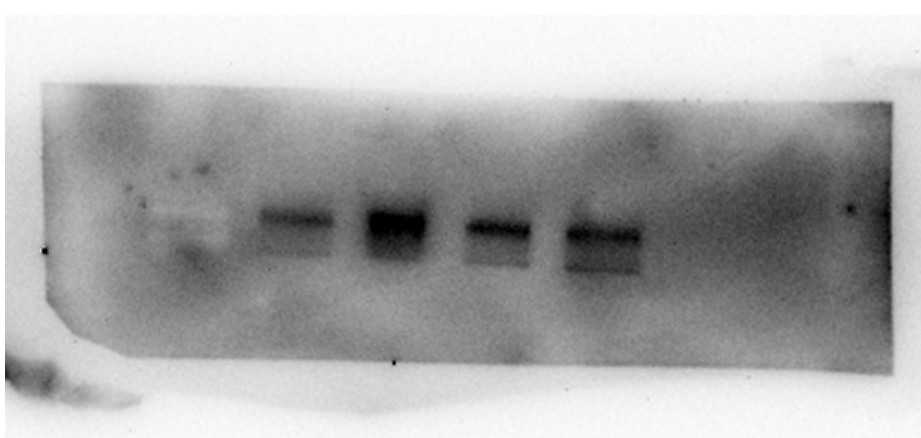

**p-IRS-1 (3)**

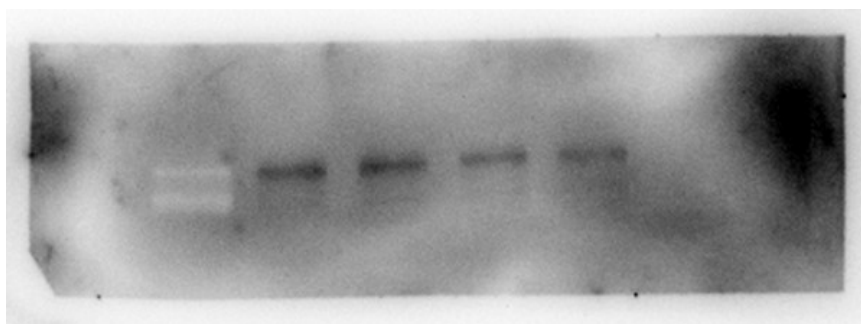

**IRS-1 (1)**

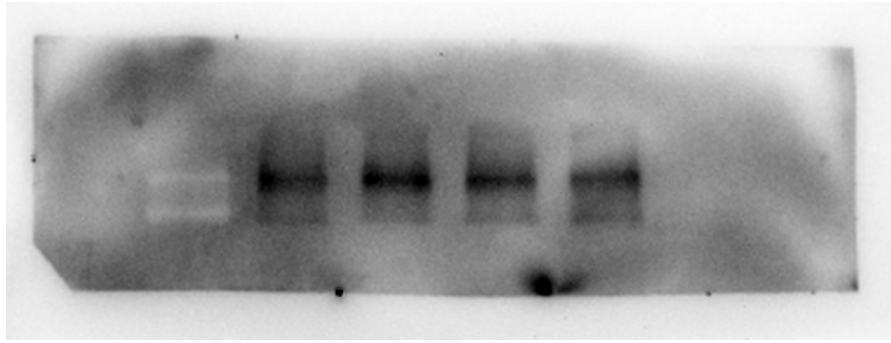

**IRS-1 (2)**

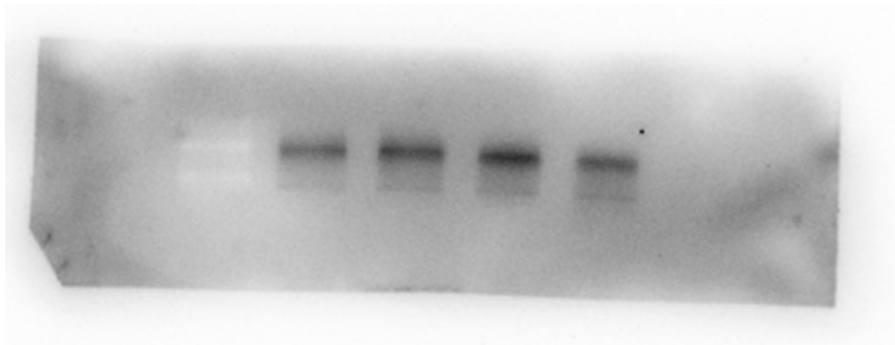

**IRS-1 (3)**

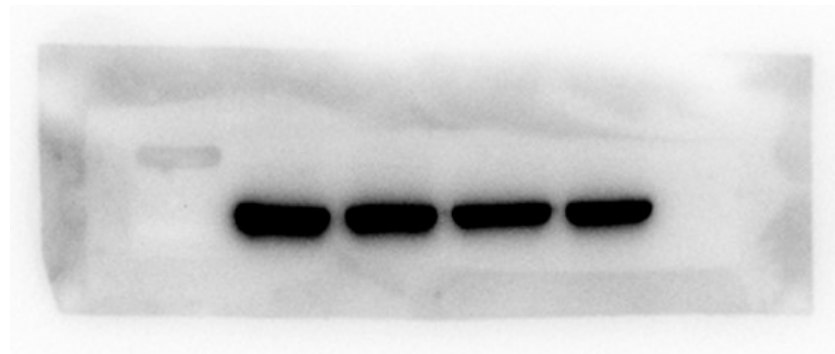

**$\beta$ -actin (1)**

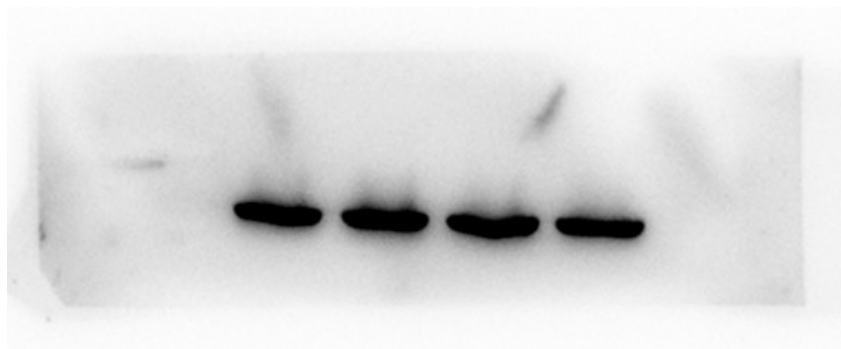

**$\beta$ -actin (2)**

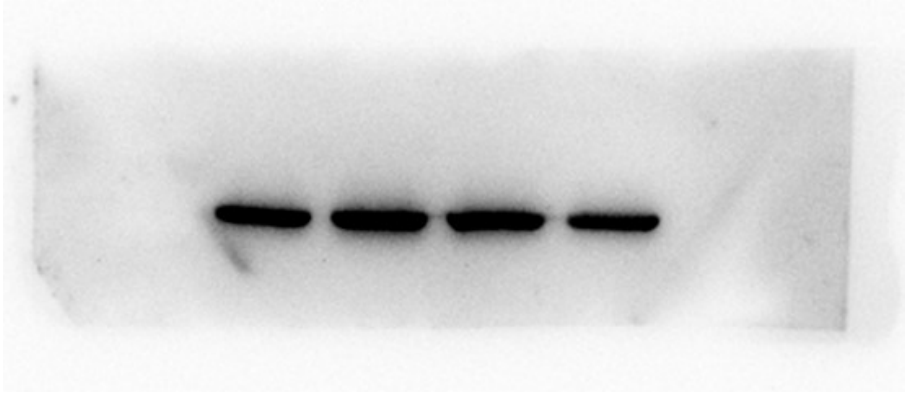

**$\beta$ -actin (3)**



**Supplementary Figure 7.**

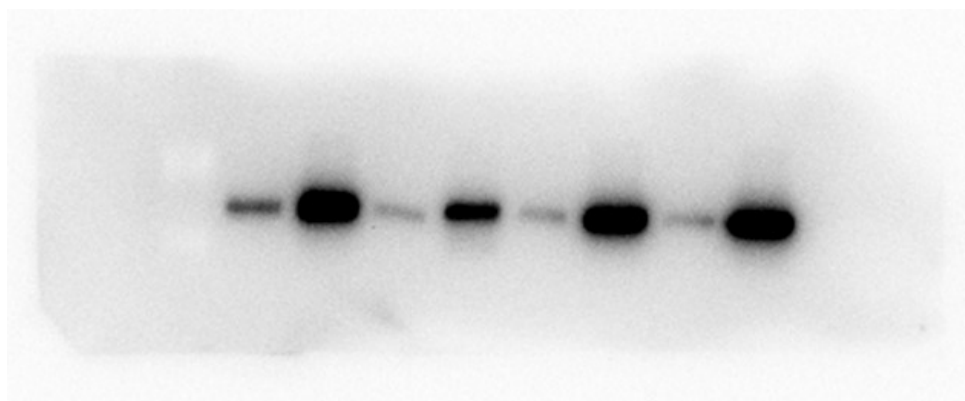

**p-Akt (1)**

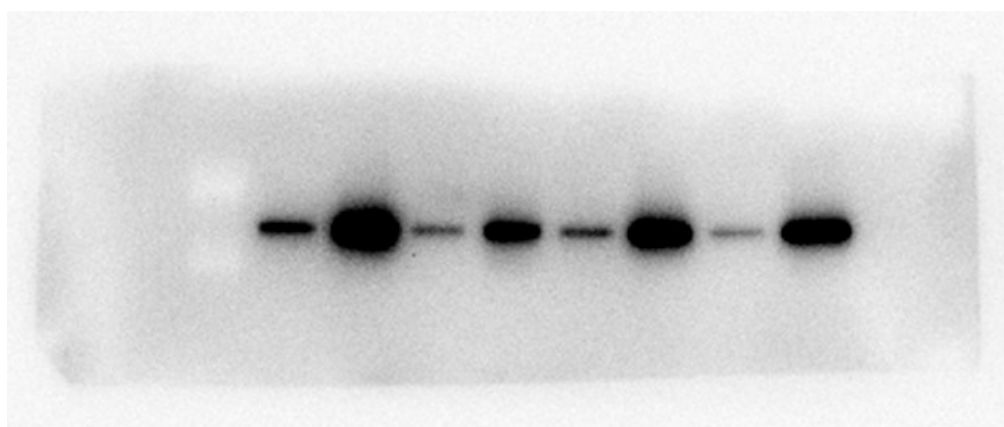

**p-Akt (2)**

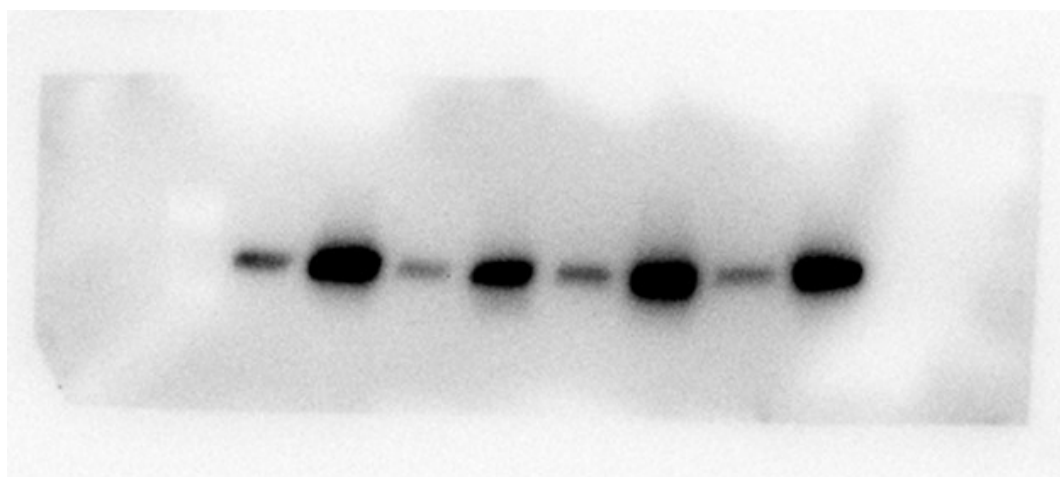

**p-Akt (3)**

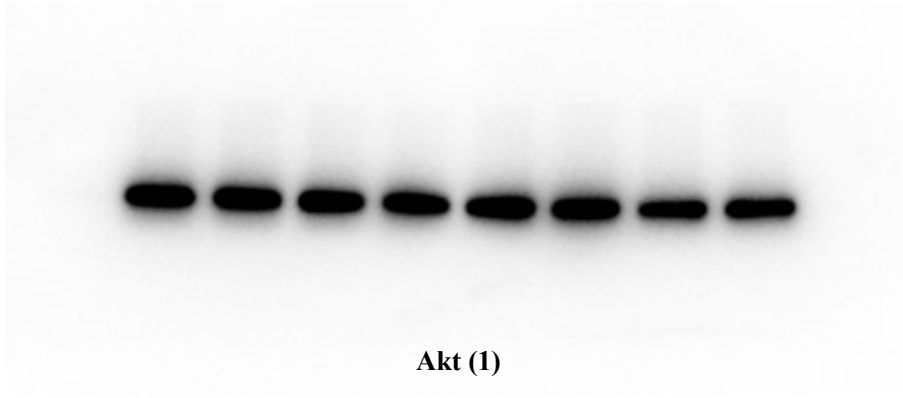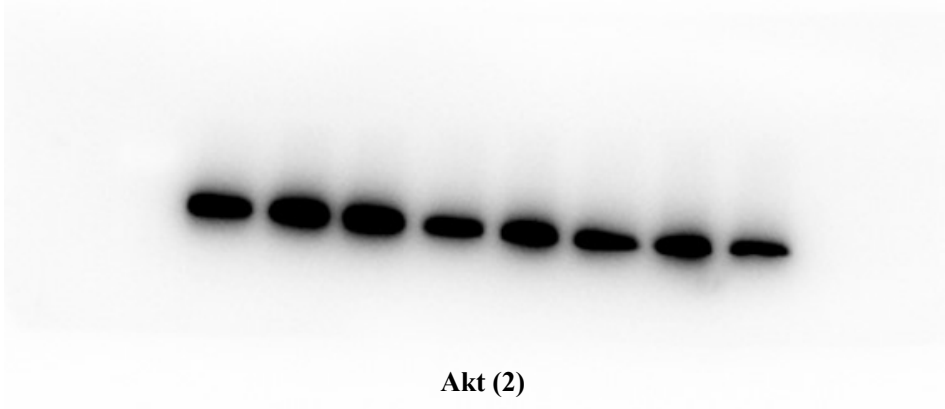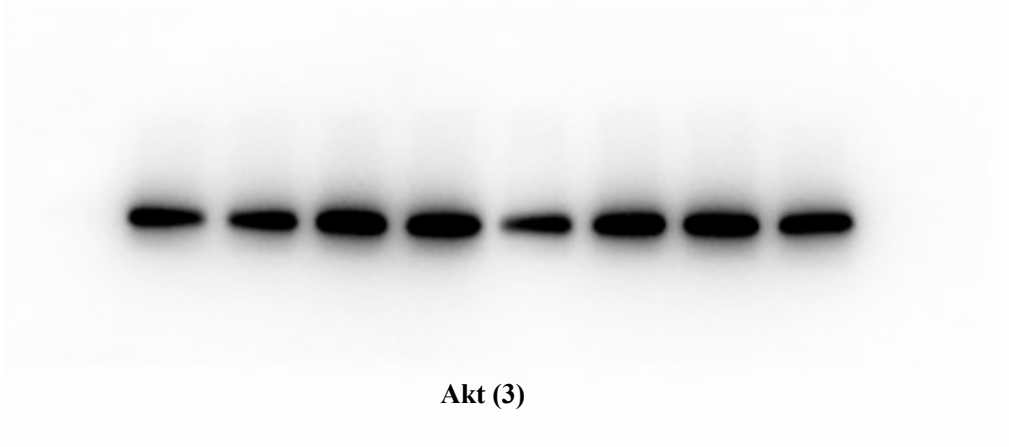

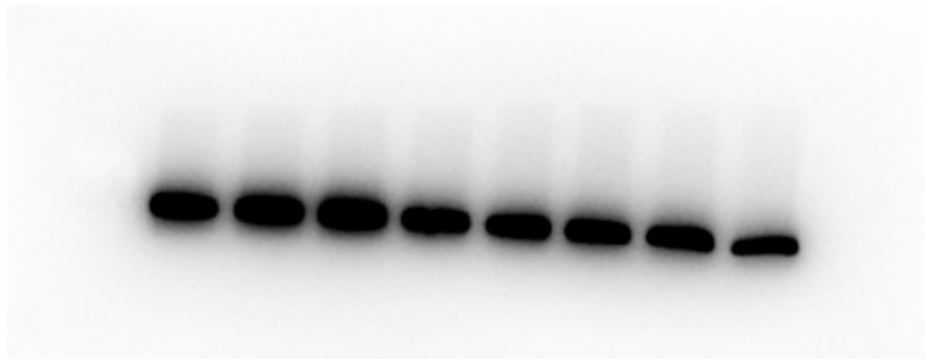

**$\beta$ -actin (1)**

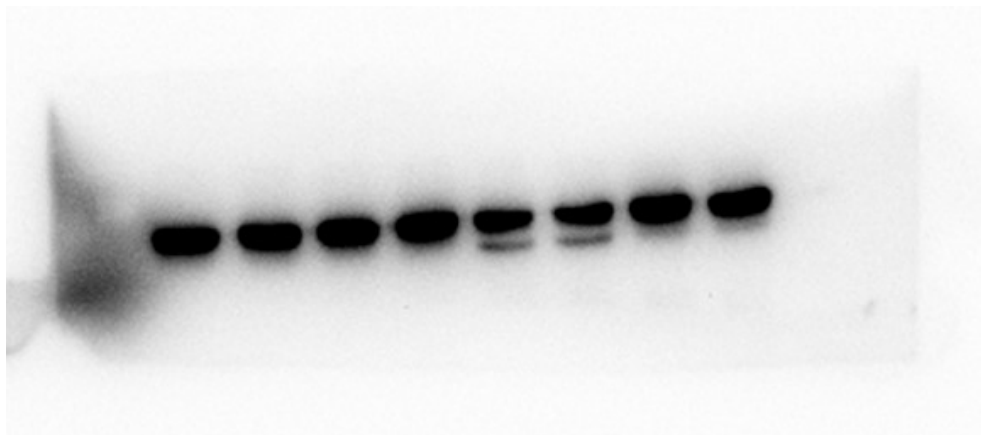

**$\beta$ -actin (2)**

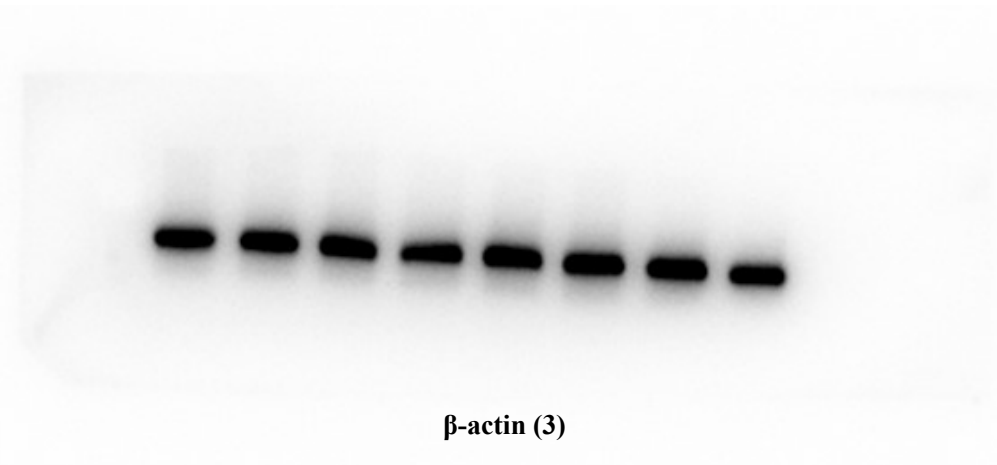

**$\beta$ -actin (3)**

**Supplementary Figure 8.**

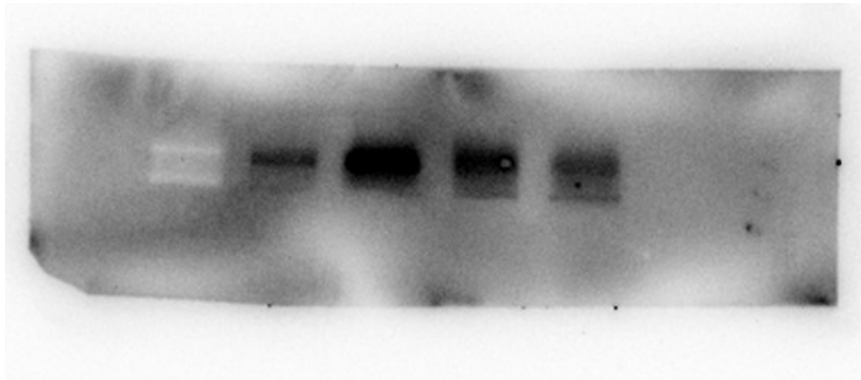

**p-IRS-1 (1)**

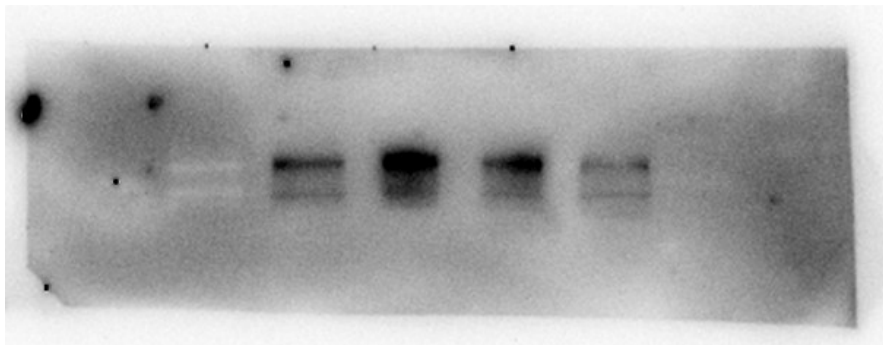

**p-IRS-1 (2)**

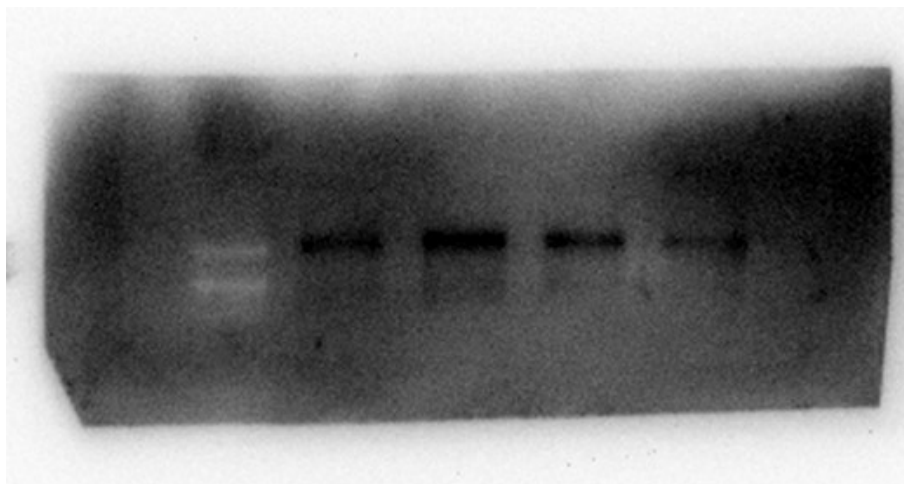

**p-IRS-1 (3)**

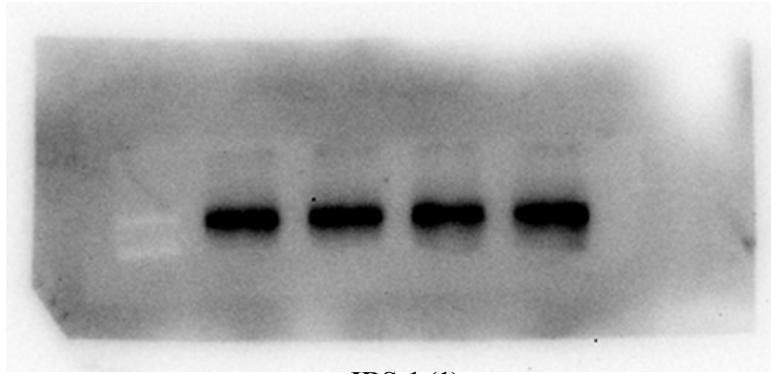

**IRS-1 (1)**

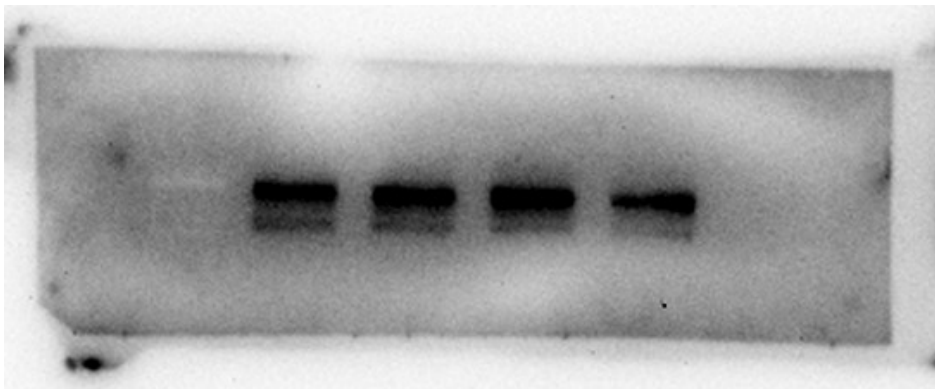

**IRS-1 (2)**

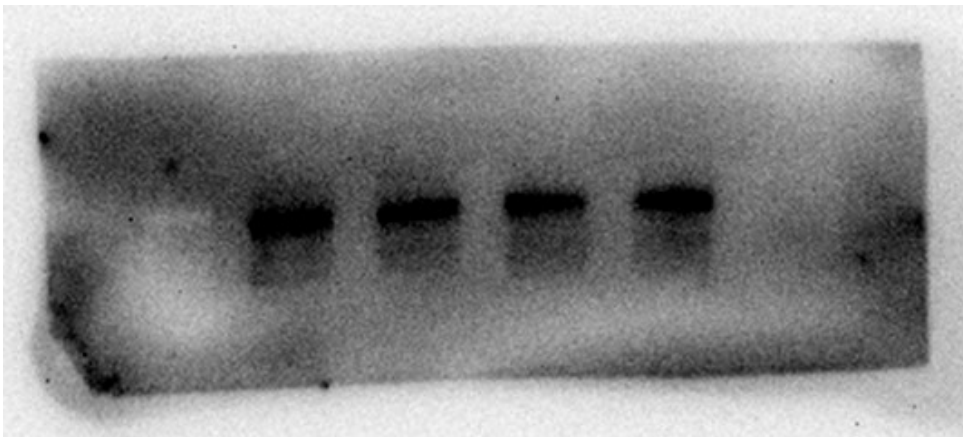

**IRS-1 (3)**

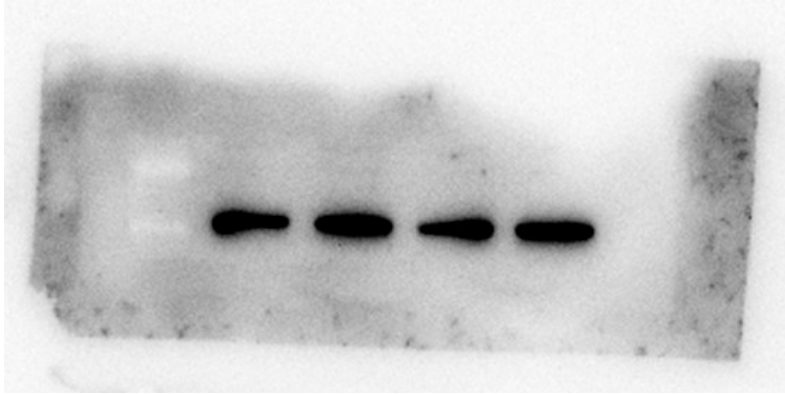

**$\beta$ -actin (1)**

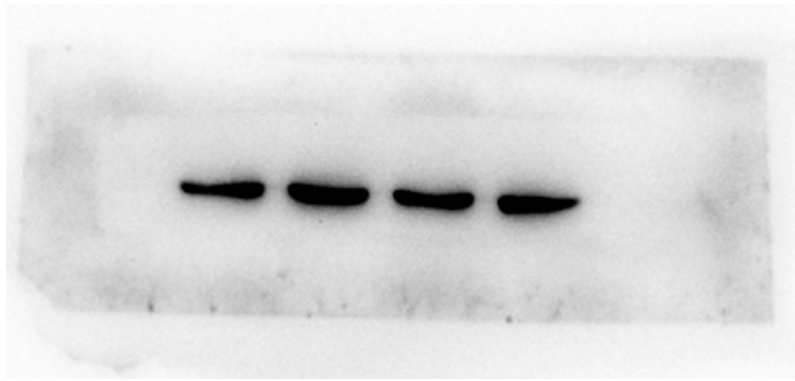

**$\beta$ -actin (2)**

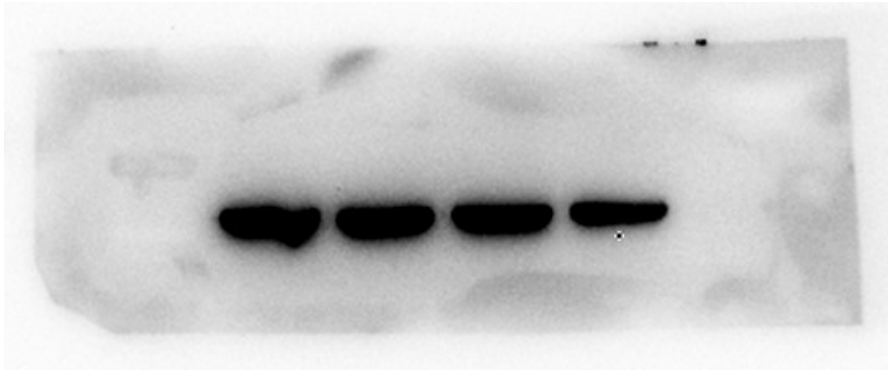

**$\beta$ -actin (3)**

Supplementary Figure 9.

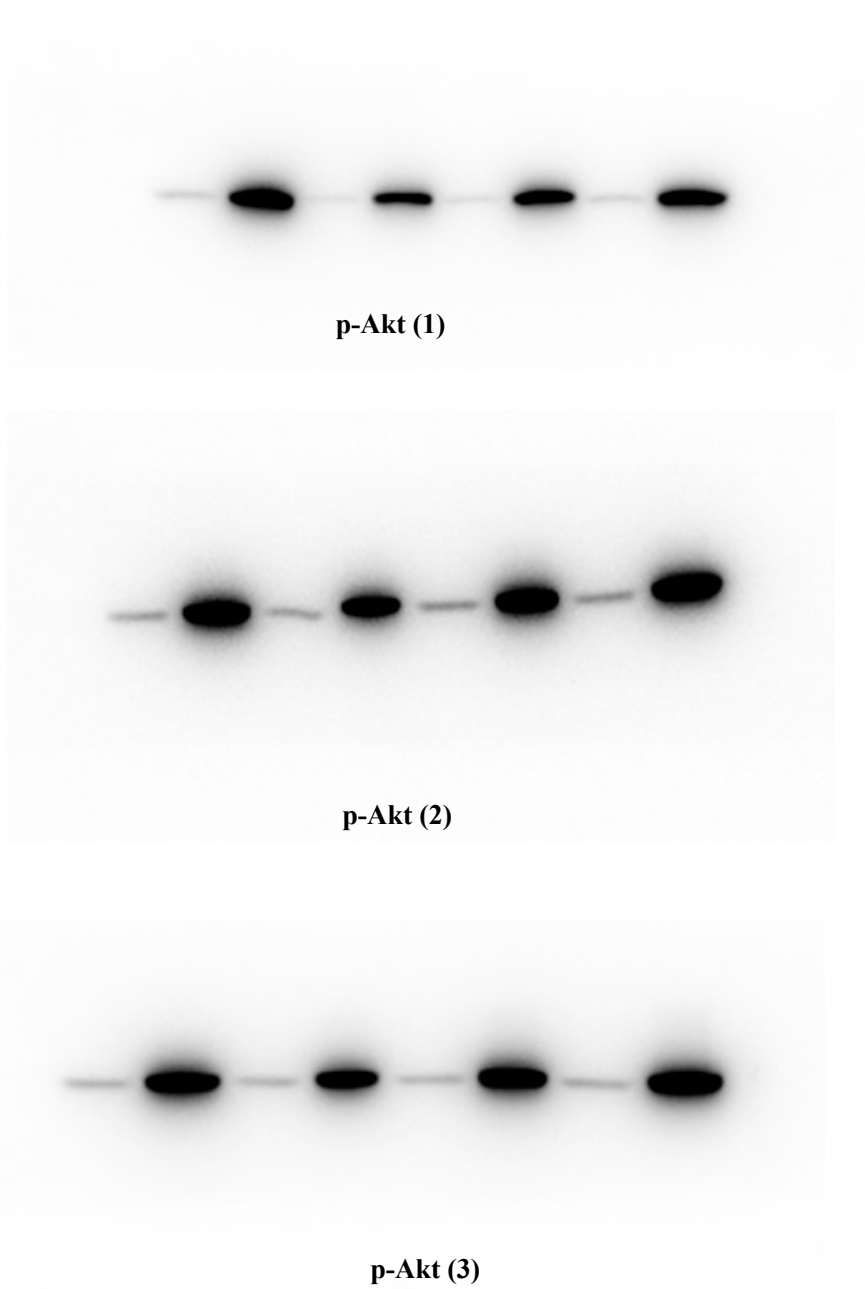

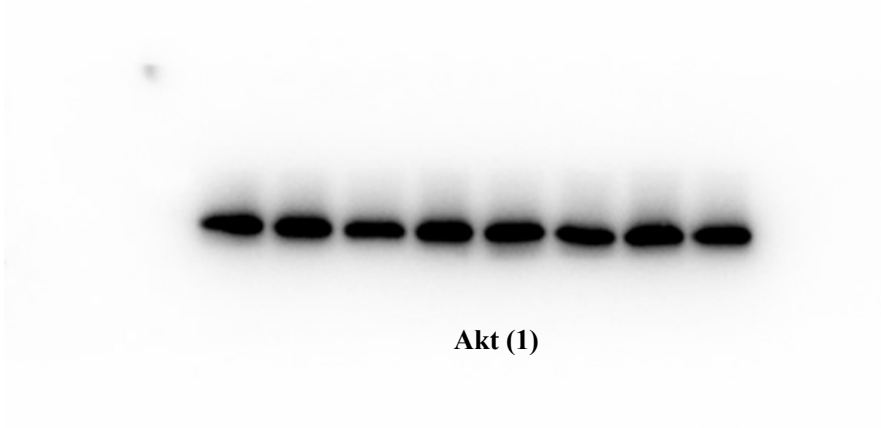

**Akt (1)**

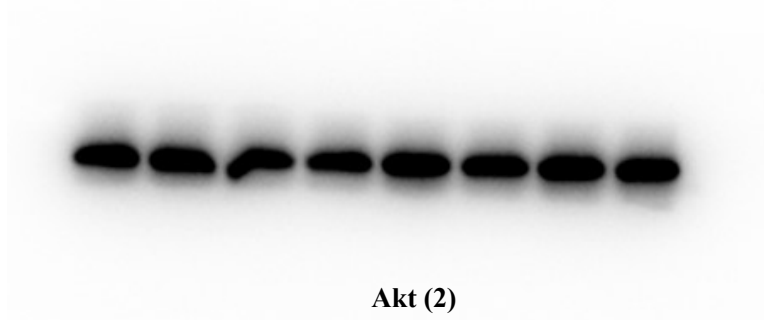

**Akt (2)**

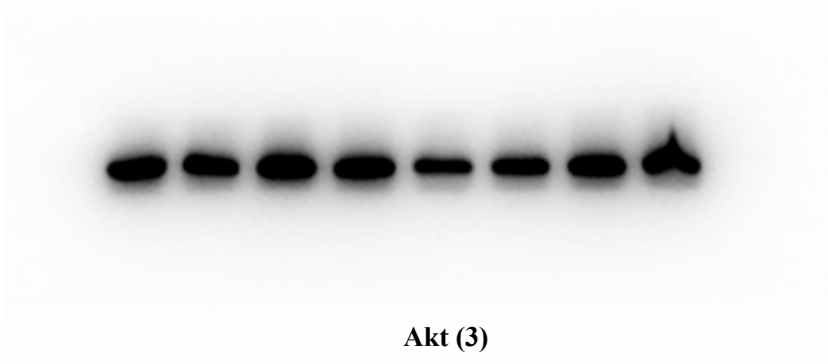

**Akt (3)**



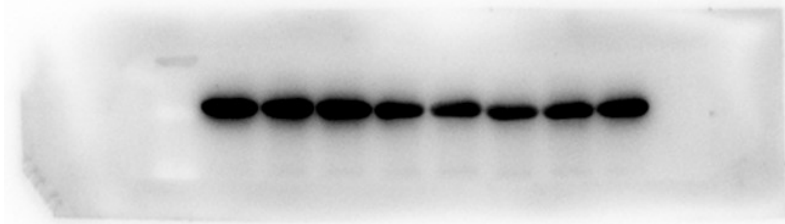

**$\beta$ -actin (1)**

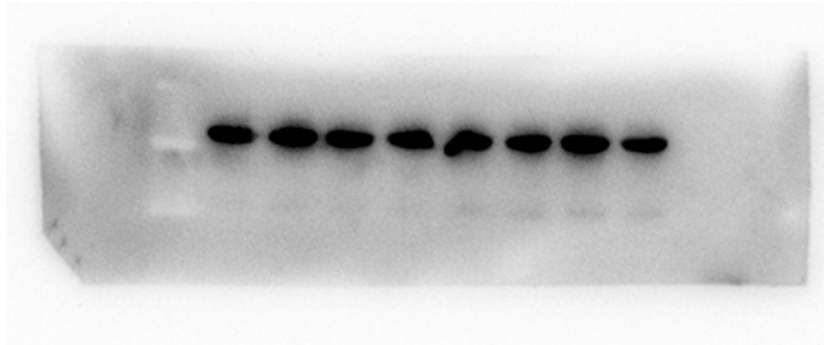

**$\beta$ -actin (2)**

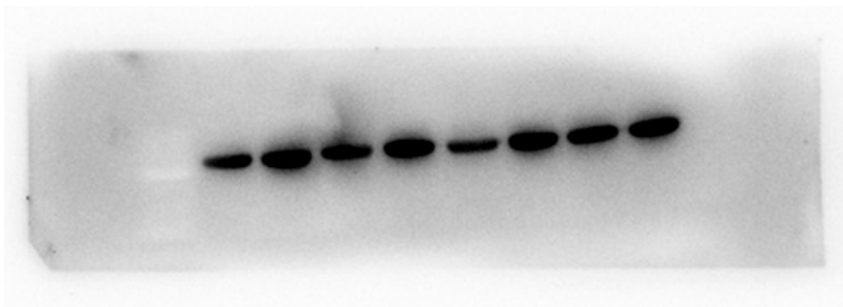

**$\beta$ -actin (3)**

**Supplementary Figure 10.**

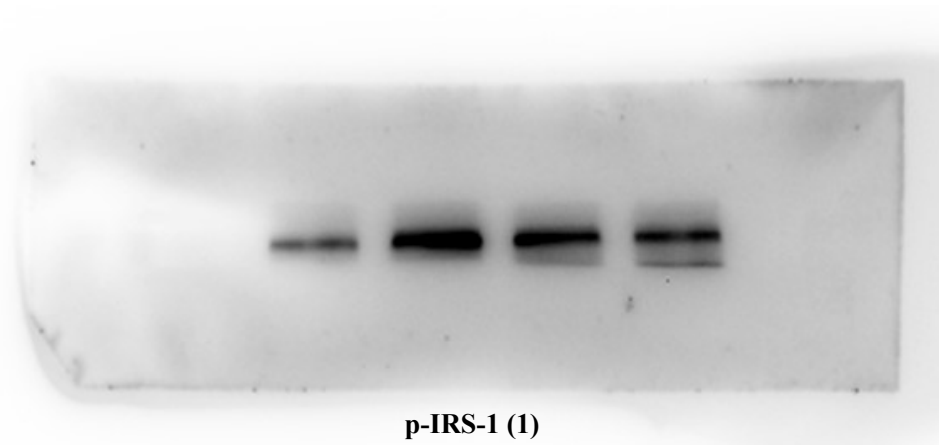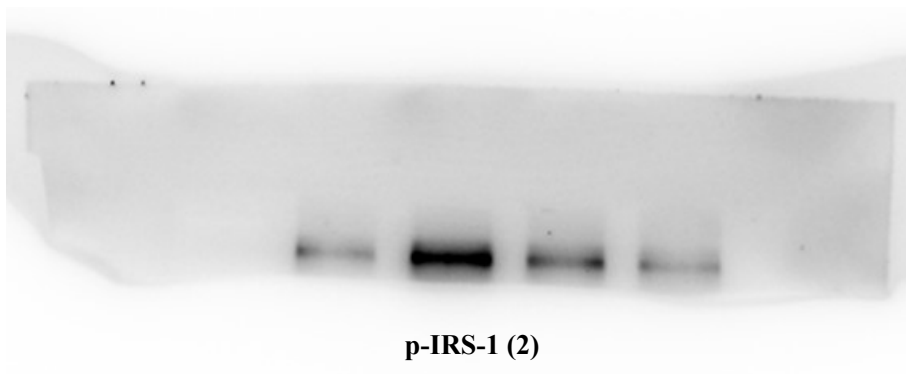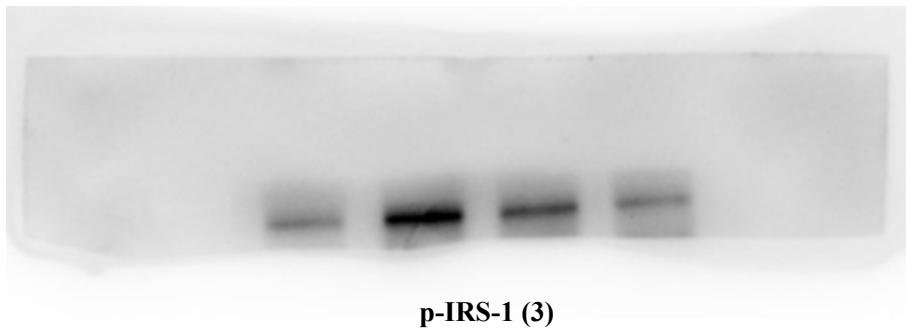

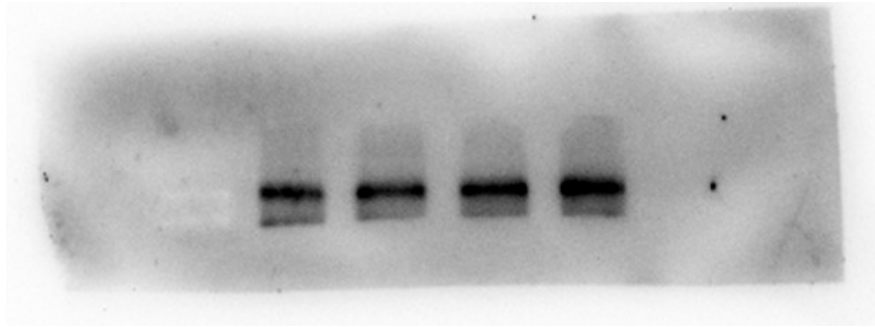

**IRS-1 (1)**

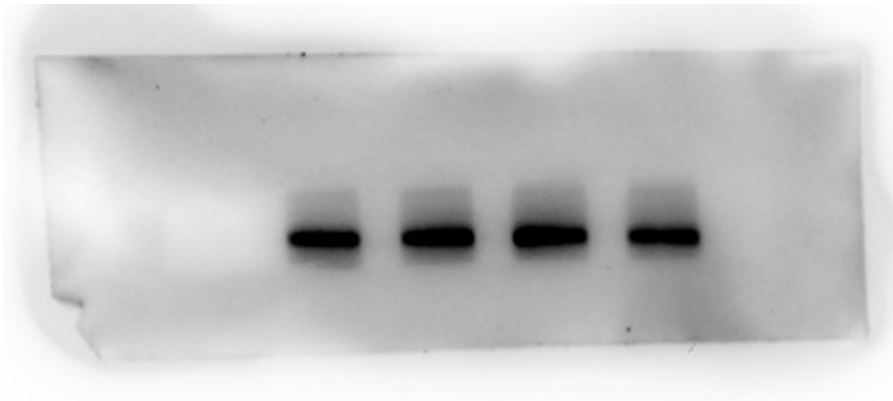

**IRS-1 (2)**

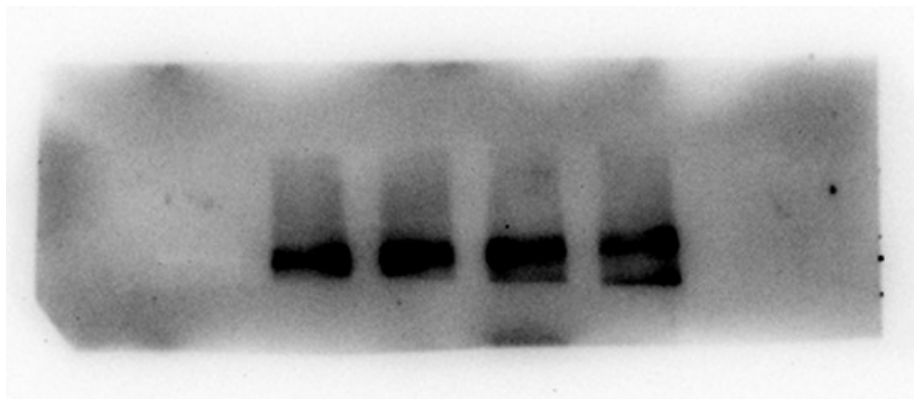

**IRS-1 (3)**

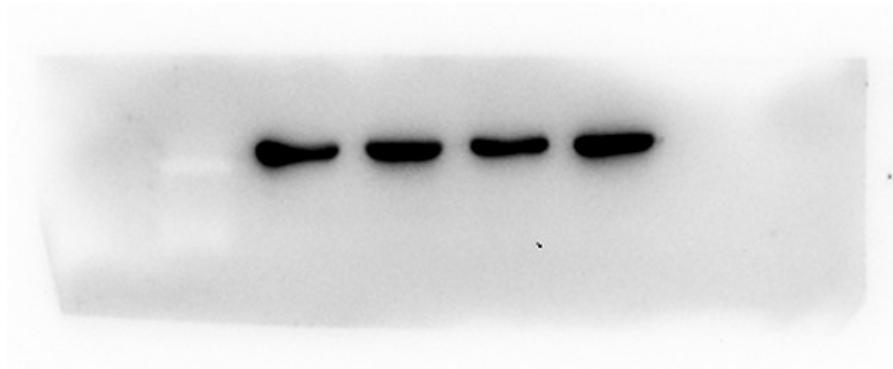

**$\beta$ -actin (1)**

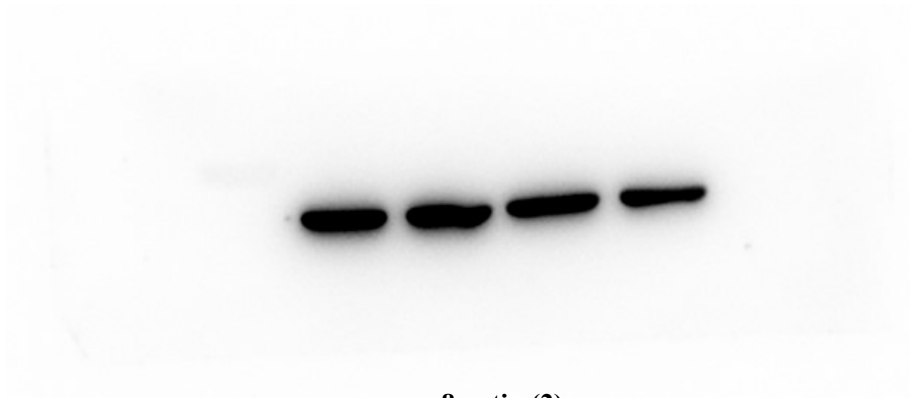

**$\beta$ -actin (2)**

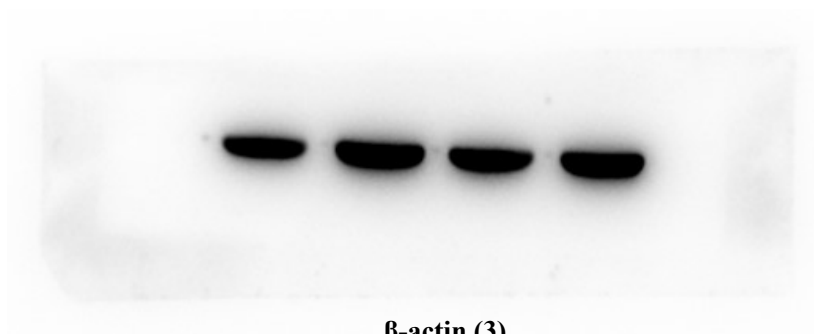

**$\beta$ -actin (3)**

**Supplementary Figure 11.**

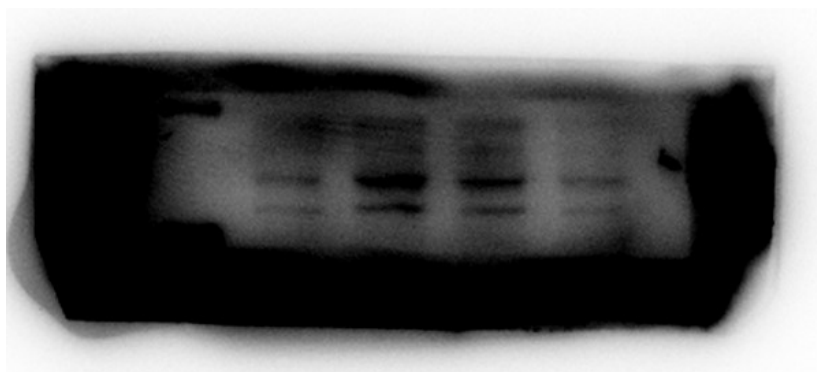

**p-JNK (1)**

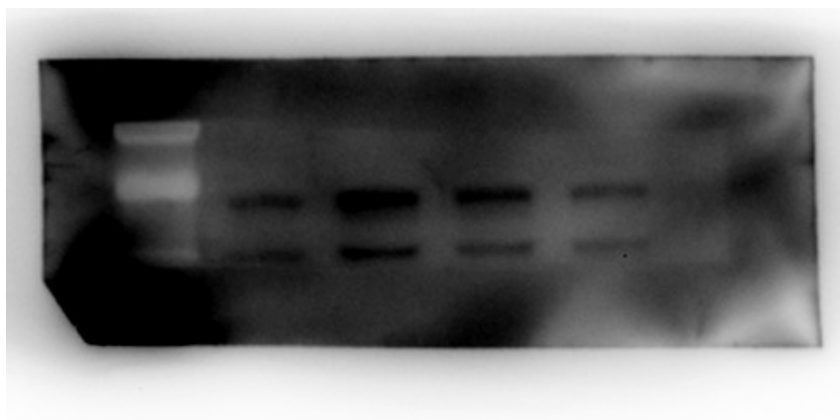

**p-JNK (2)**

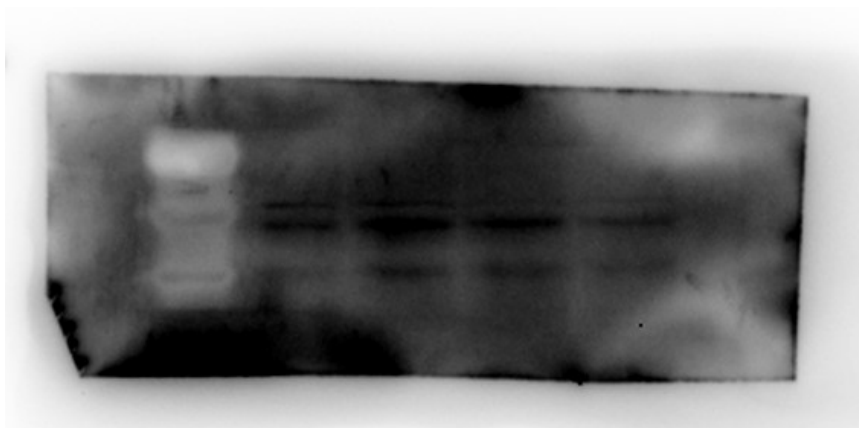

**p-JNK (3)**

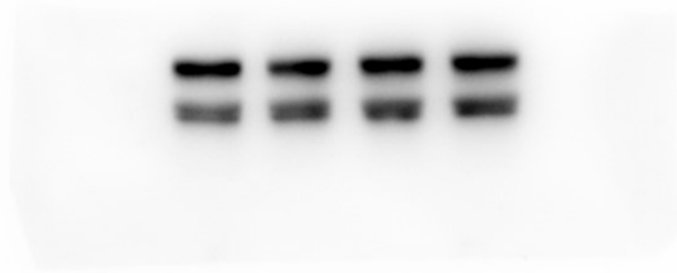

**JNK (1)**

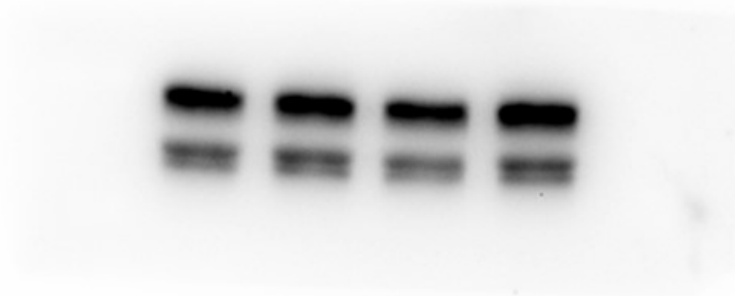

**JNK (2)**

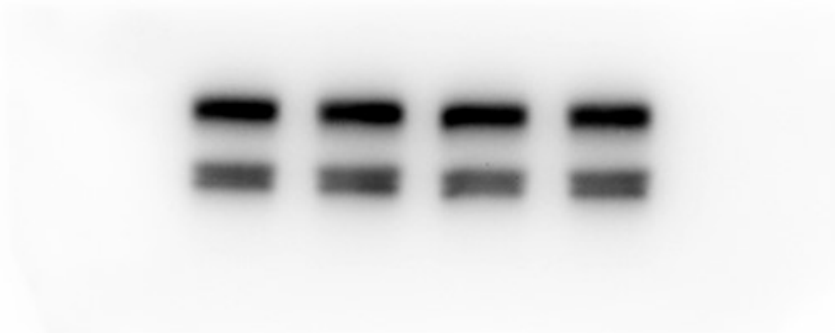

**JNK (3)**

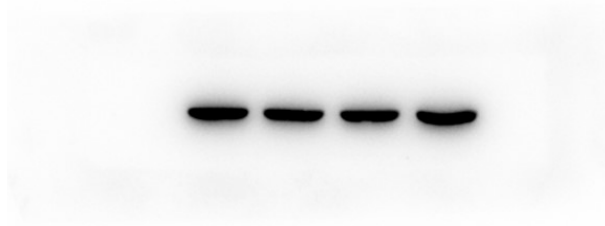

**$\beta$ -actin (1)**

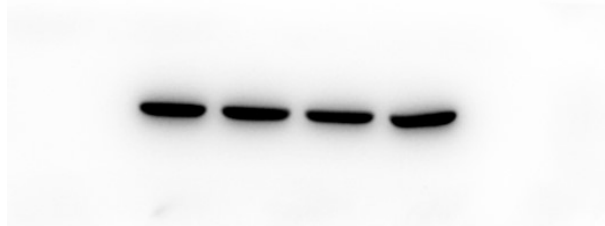

**$\beta$ -actin (2)**

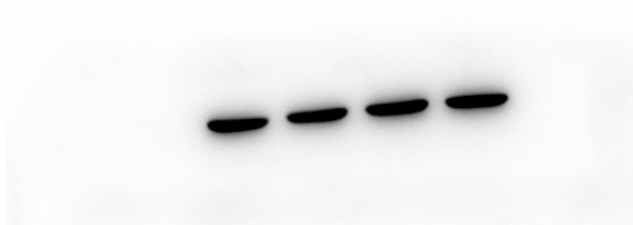

**$\beta$ -actin (3)**

**Supplementary Figure 12.**

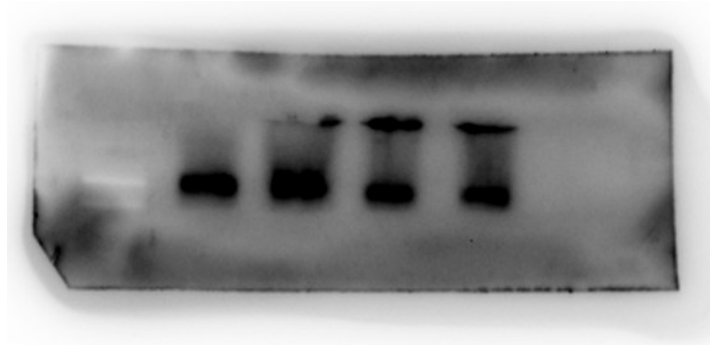

**p-IRS-1 (1)**

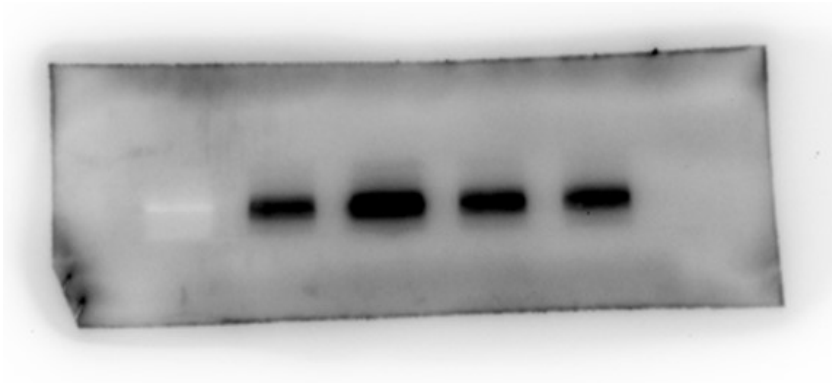

**p-IRS-1 (2)**

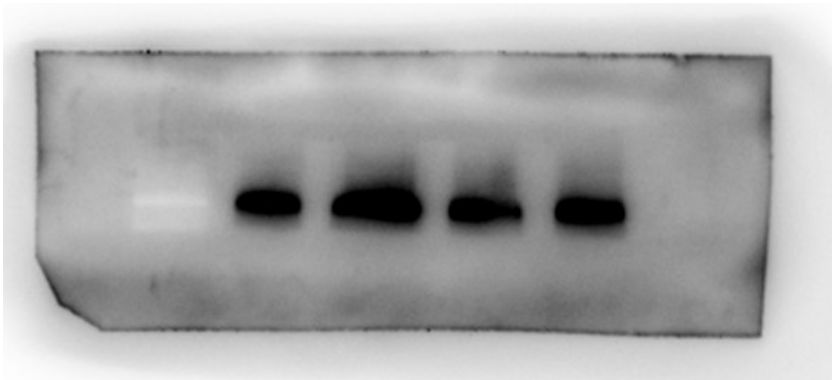

**p-IRS-1 (3)**



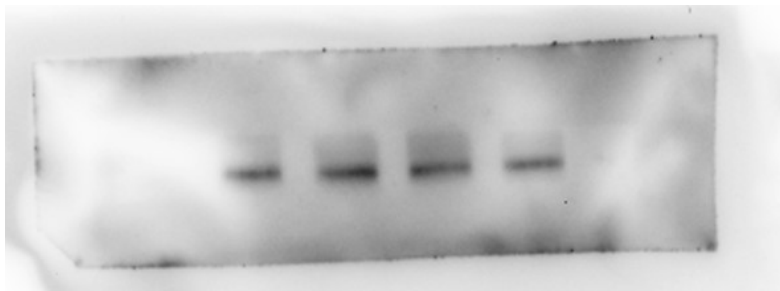

**IRS-1 (1)**

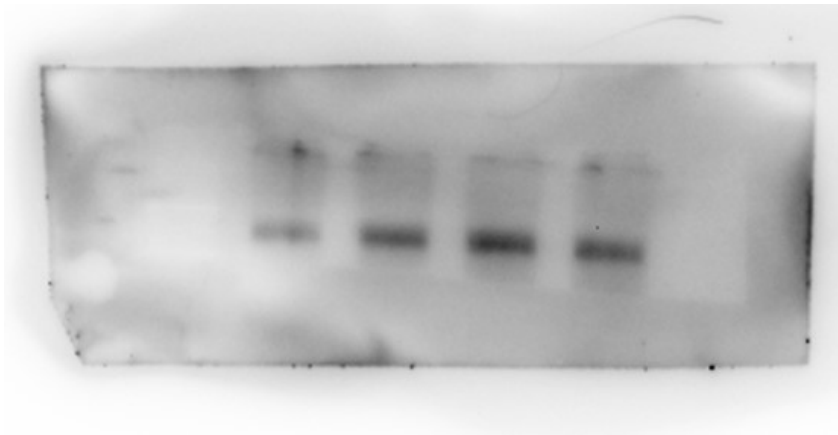

**IRS-1 (2)**

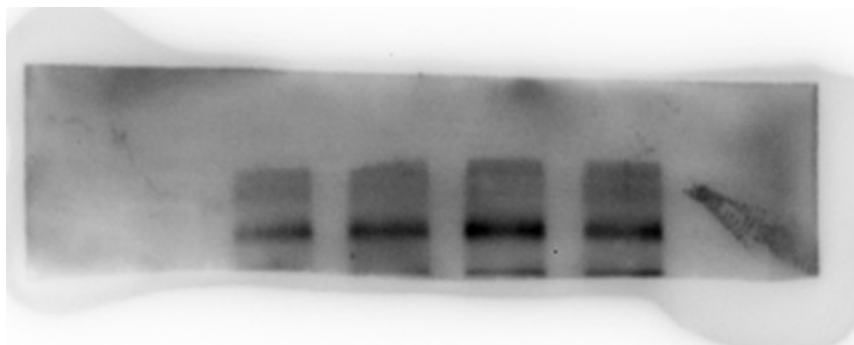

**IRS-1 (3)**

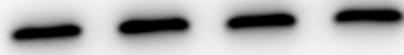

**$\beta$ -actin (1)**

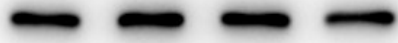

**$\beta$ -actin (2)**

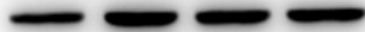

**$\beta$ -actin (3)**

Supplementary Figure 13.

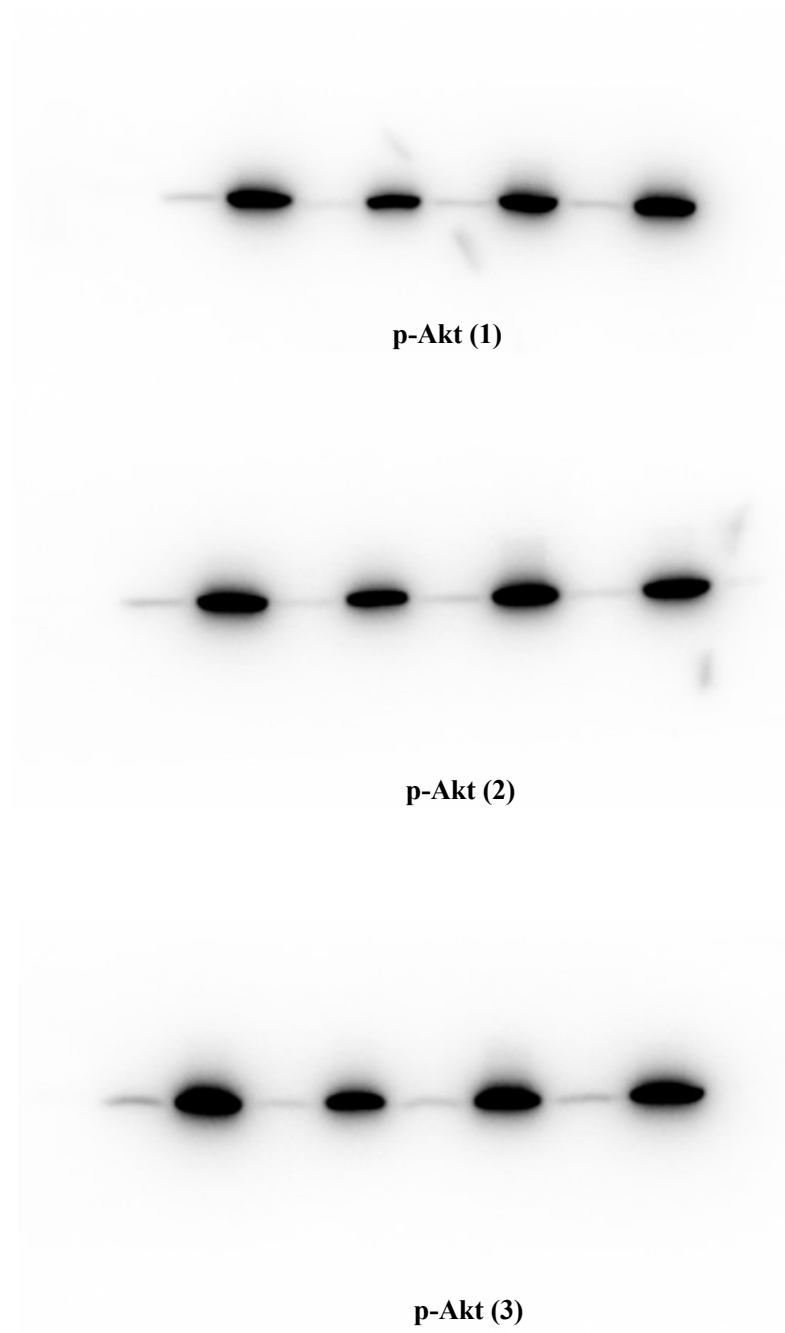

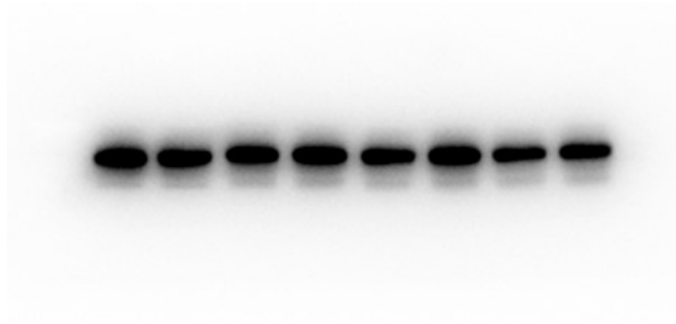

**Akt (1)**

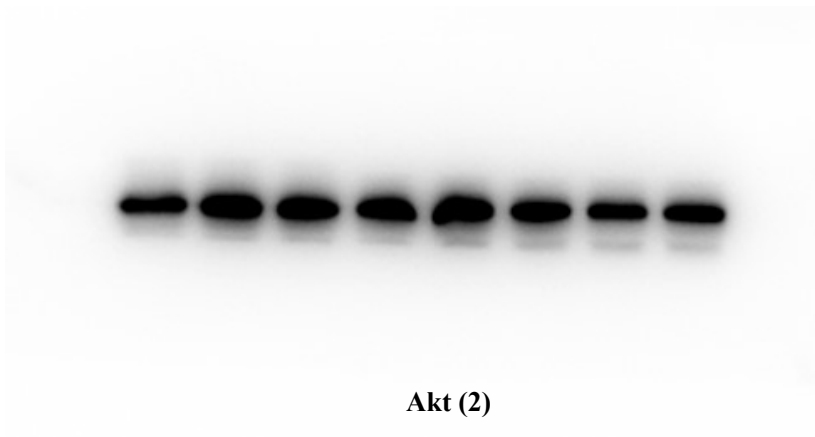

**Akt (2)**

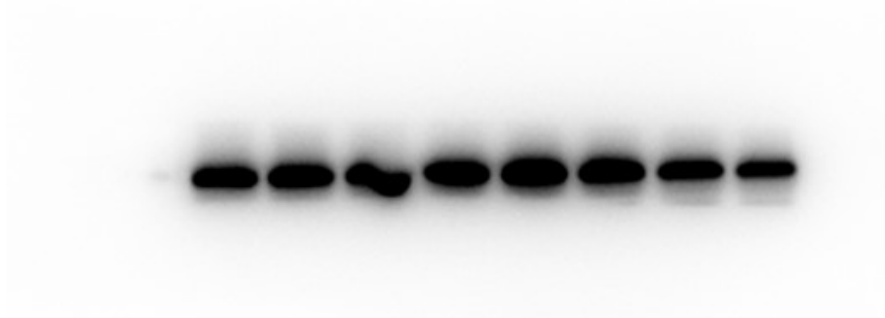

**Akt (3)**

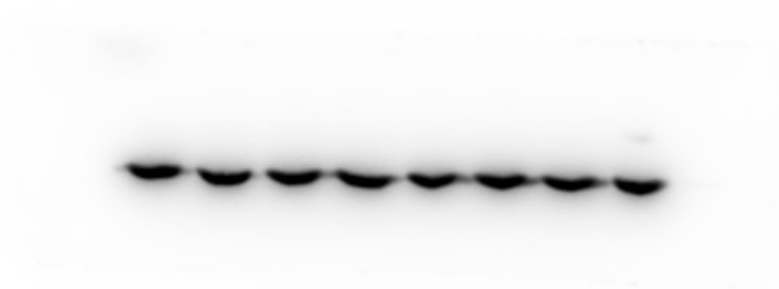

**$\beta$ -actin (1)**

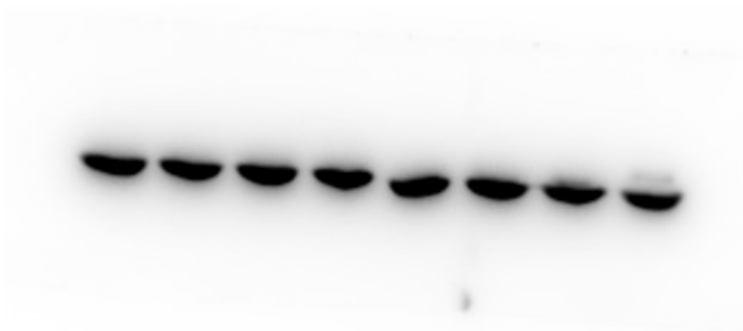

**$\beta$ -actin (2)**

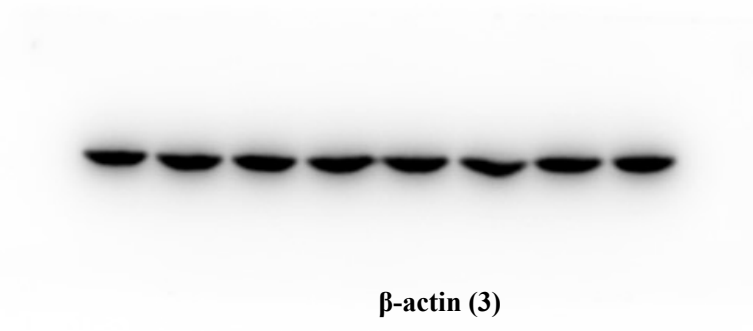

**$\beta$ -actin (3)**

**Supplementary Figure 14.**

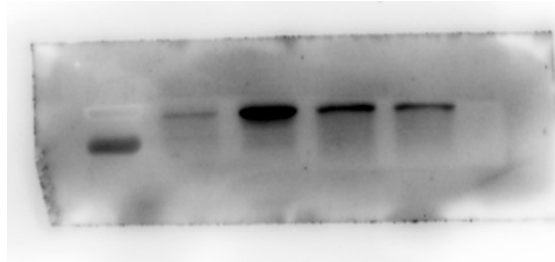

**Nuclear NF-κB p65 (1)**

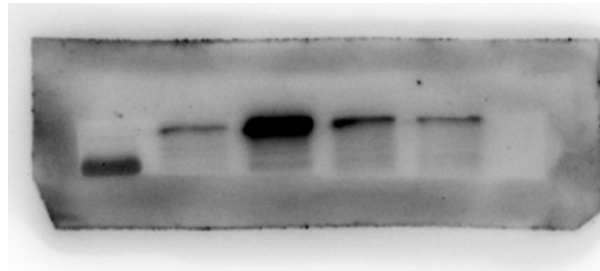

**Nuclear NF-κB p65 (2)**

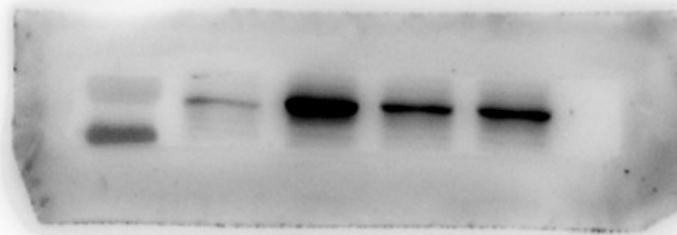

**Nuclear NF-κB p65 (3)**

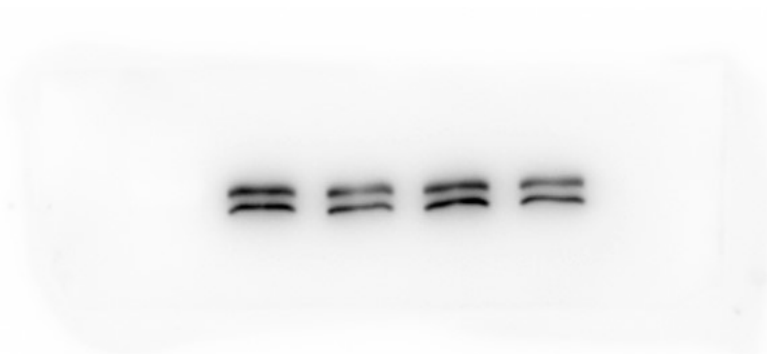

**Nuclear lamin A/C (1)**

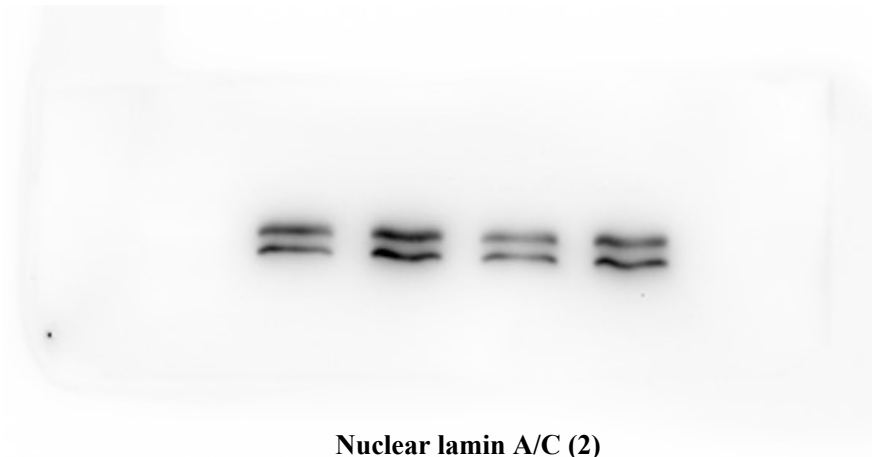

**Nuclear lamin A/C (2)**

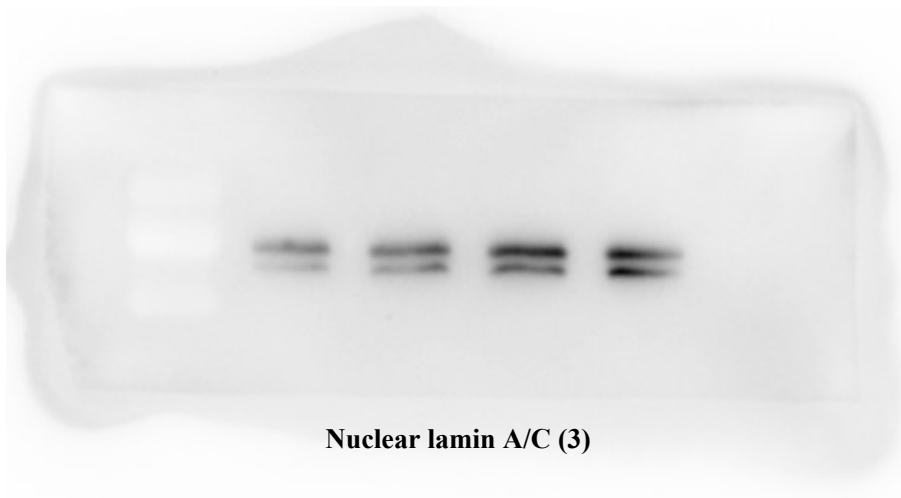

**Nuclear lamin A/C (3)**

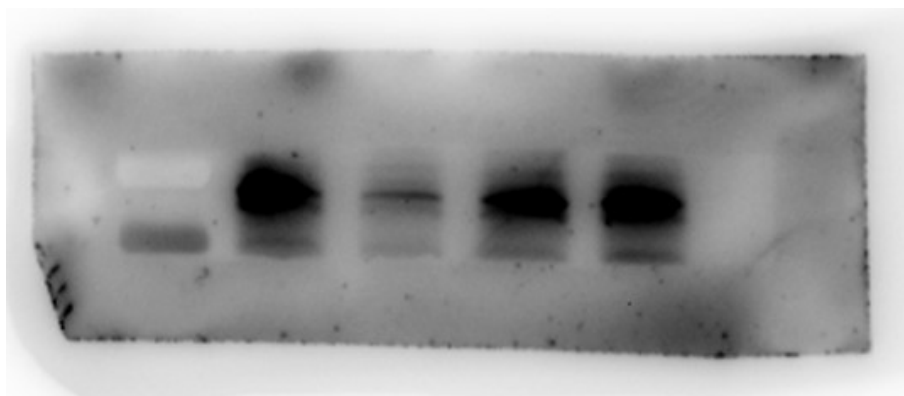

**Cytoplasmic NF-κB p65 (1)**

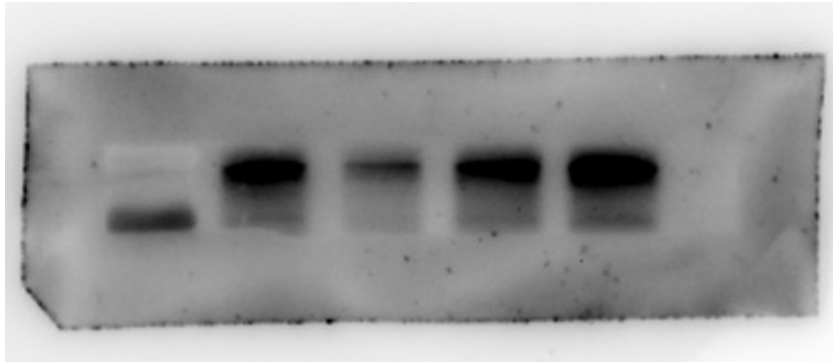

**Cytoplasmic NF- $\kappa$ B p65 (2)**

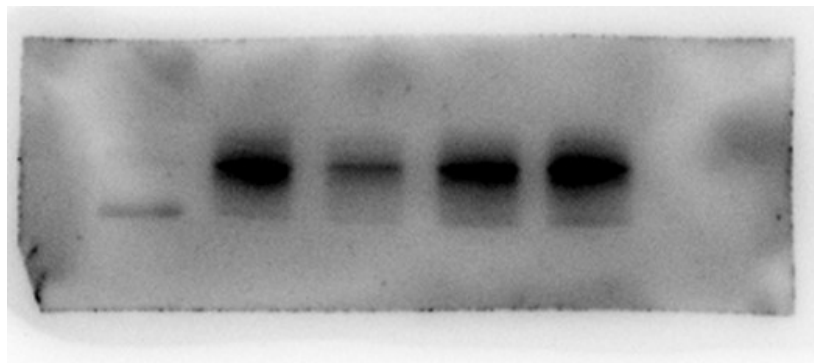

**Cytoplasmic NF- $\kappa$ B p65 (3)**

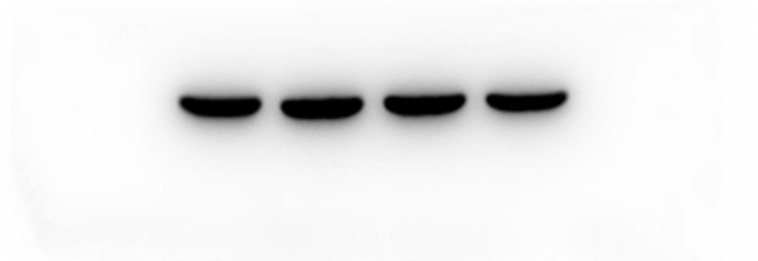

**Cytoplasmic  $\beta$ -actin (1)**

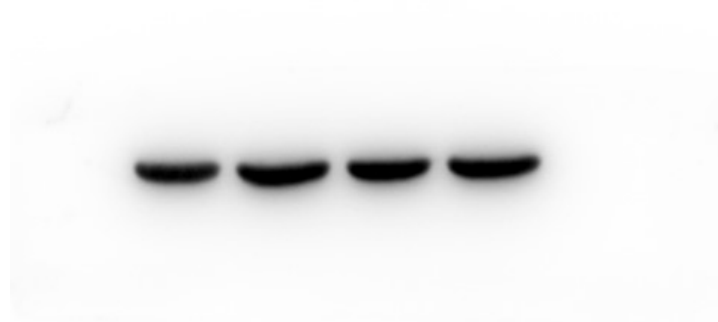

**Cytoplasmic  $\beta$ -actin (2)**



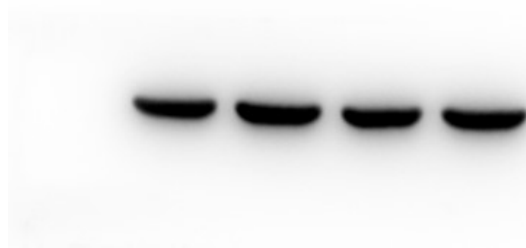

**Cytoplasmic  $\beta$ -actin (3)**

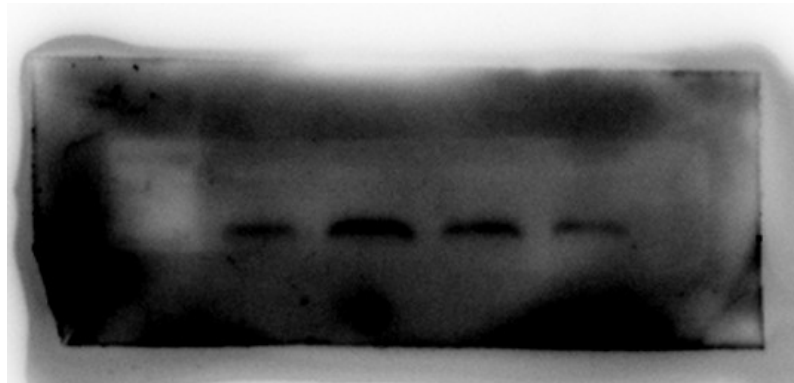

**p-I $\kappa$ B $\alpha$  (1)**

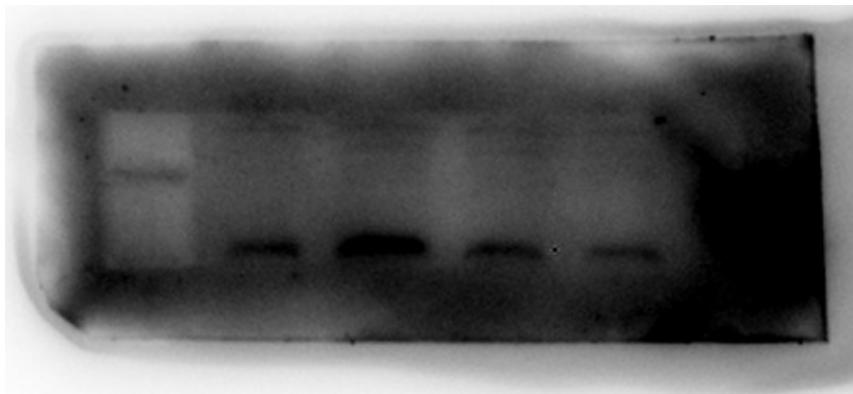

**p-I $\kappa$ B $\alpha$  (2)**

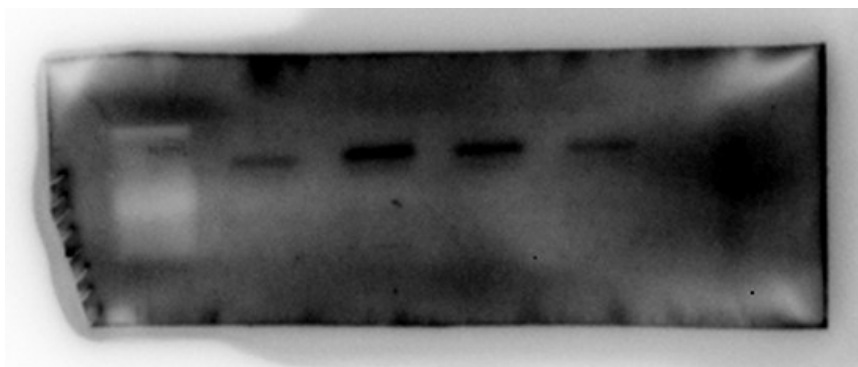

**p-I $\kappa$ B $\alpha$  (3)**

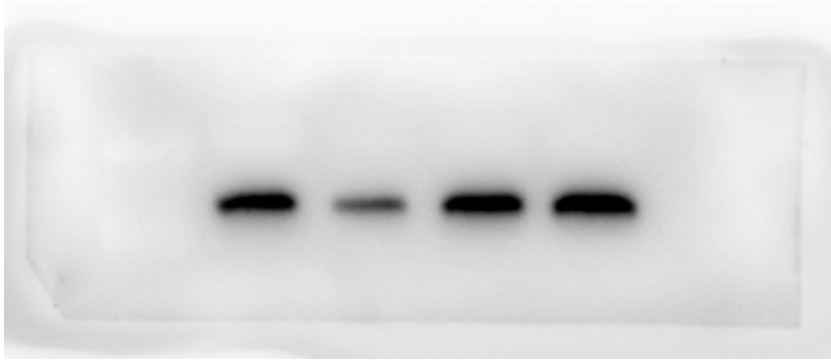

**IκBα (1)**

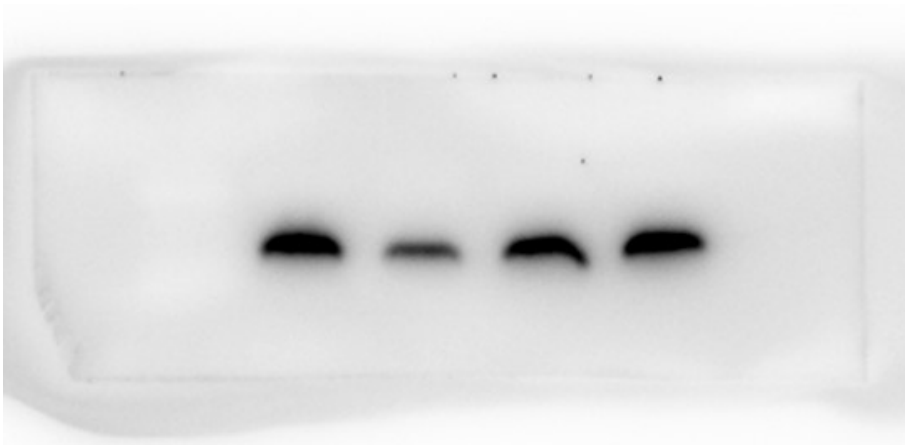

**IκBα (2)**

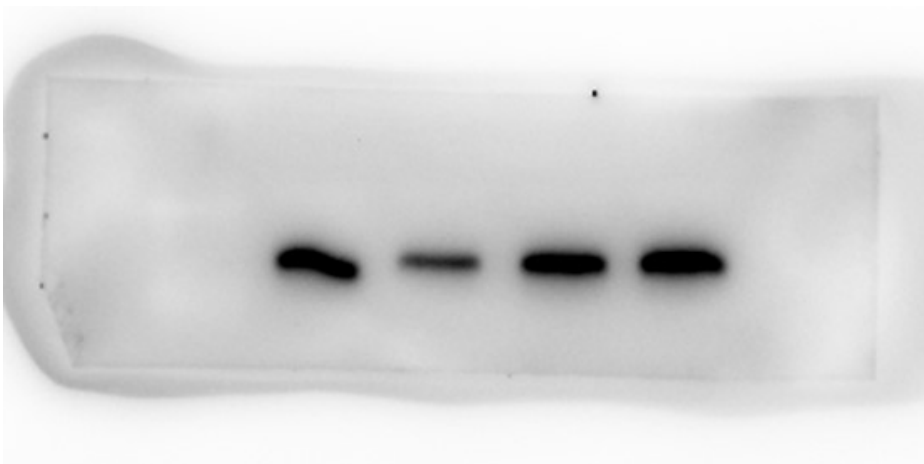

**IκBα (3)**

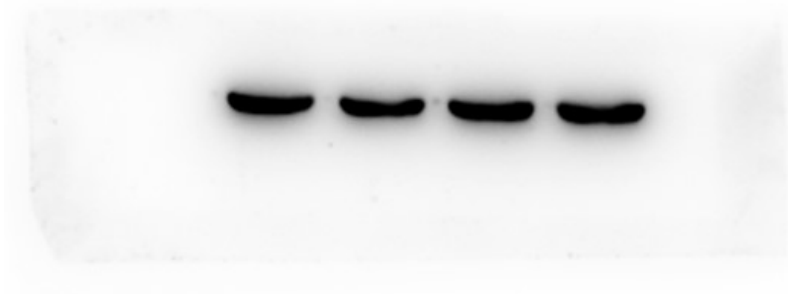

**$\beta$ -actin (1)**

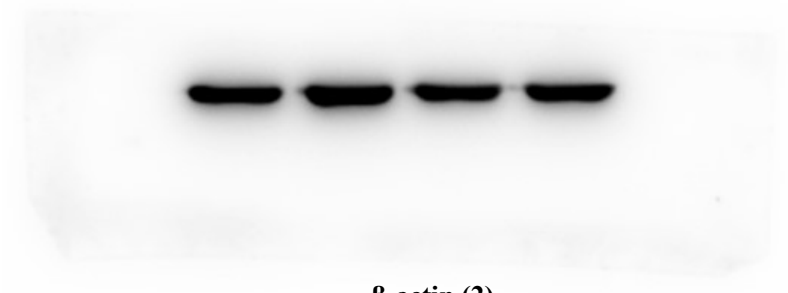

**$\beta$ -actin (2)**

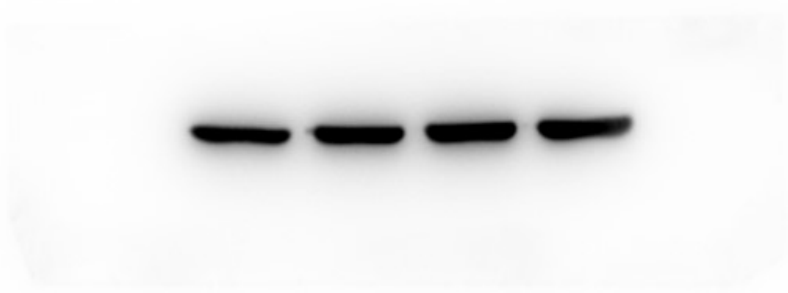

**$\beta$ -actin (3)**
